# Supplementary material
Source: ML conference proceedings conference paper supplement (https://proceedings.neurips.cc/paper_files/paper/2019/hash/e4dd5528f7596dcdf871aa55cfccc53c-Abstract.html)
Supplement: Supplementary file 27 [file human_concepts.xlsx]

## Sheet: Sheet1
african_americans
american_flag
animal_rights
antifa
christian
church
college_students
confederate_flag
constitution
cross-dressing
disabled
diverse_people
dunkin_donuts
environment
equality
founding_fathers
fracking
gay
hispanics
hollywood_actors_singers_arts_intellectuals
illegal_immigrants
intelligence_operatives
iranian
jewish
latin_america
lesbian
lgbt_flag
luxury
male
marijuana
middle_eastern
military
minorities
muslim_terrorist
muslims
nature
navy_ship
old
patriotism
pink_hair
police
police_violence
poor_people
prison
protest
rally
rappers
refugees
religion
san_francisco
sick
solar_panels
starbucks
technology_use
tradition
video_games_anime
voting_booth_voter
wealth
white
white_supremacist_domestic_terrorism
windmills
women
working_class
young_people
