# Supplementary material
Source: ML conference proceedings conference paper supplement (https://proceedings.neurips.cc/paper_files/paper/2019/hash/e4dd5528f7596dcdf871aa55cfccc53c-Abstract.html)
Supplement: Supplementary file 28 [file learned_word_embeddings.xlsx]

## Sheet: Sheet1
charlottesville	clinton	dreamers	fascist	fbi	fox	immigration	obama	stoneman	supremacist	terrorism	trump
-----	-----	-----	-----	-----	-----	-----	-----	-----	-----	-----	-----
parkland	o'reilly	daca	fascism	cia	nbc	immigrants	trump	parkland	supremacists	extremism	obama
antifa	maher	immigrants	racists	comey	cbs	immigrant	bush	nra	supremacy	islamophobia	bush
ferguson	obama	undocumented	racist	doj	abc	aliens	reagan	gunman	nationalist	extremists	duterte
dallas	bush	aliens	nationalist	irs	breitbart	daca	erdogan	shooter	house	racism	erdogan
rally	huckabee	immigration	extremist	investigation	cable	deportation	bashar	morning	privilege	extremist	sterling
nfl	merkel	deportation	supremacist	mueller	fake	dreamers	clinton	separating	dana	fascism	reagan
islamophobia	trump	illegally	democrat	intelligence	buzzfeed	amnesty	duterte	shootings	fascist	fbi	corbyn
berkeley	blasio	deferred	supremacy	flynn	cnn	foreign	macron	cbs	extremist	bigotry	macron
spencer	davis	shutdown	bigotry	wikileaks	hannity	visa	carter	sheriff	conspiracy	immigration	clinton
shootings	treasury	amnesty	supremacists	dhs	outlet	abortion	vice	ripped	racist	shootings	bashar
tweeted	benghazi	bipartisan	islamophobia	epa	msnbc	tax	obamacare	outrage	evangelical	russia	cameron
protesters	bernie	immigrant	antifa	nypd	anchor	prime	trudeau	charlottesville	racists	hate	vladimir
tweet	perry	recipients	hatred	shooter	o'reilly	shootings	cameron	evening	antifa	antifa	trudeau
supremacists	carter	republicans	conspiracy	prosecution	conference	undocumented	netanyahu	parenthood	marjory	intelligence	obamacare
controversy	nelson	citizenship	socialist	nfl	reid	citizenship	corbyn	speaker	sharon	brutality	sanders
benghazi	reagan	democrats	hate	administration	outlets	sanctuary	republicans	abc	liberal	murder	duke
fascism	biden	lawmakers	bannon	emails	network	terrorism	vladimir	rallies	libertarian	harassment	romney
nra	miller	medicare	hussein	memo	rabble	clinton	putin	deportation	promoted	deficit	holder
fbi	cooper	taxpayers	rallies	investigative	gop	tuesday	emanuel	mccain	extremists	bullying	mueller
demonstrators	harris	racists	republican	cnn	dallas	alien	congress	mps	opposing	airstrikes	carter
