# Supplementary material
Source: ML conference proceedings conference paper supplement (https://proceedings.neurips.cc/paper_files/paper/2019/hash/e4dd5528f7596dcdf871aa55cfccc53c-Abstract.html)
Supplement: Supplementary file 29 [file media_source_results.xlsx]

## Sheet: Sheet1
Leaning	Test Set Count	Media Source	Resnet	Joo	Human Concepts	Ours		Ours (GT)
right	18	ac2news.com	0.833333	0.555556	0.777778	0.388889		0.833333
right	242	acculturated.com	0.438017	0.508264	0.442149	0.520661		0.644628
right	107	aclj.org	0.598131	0.757009	0.672897	0.728972		0.878505
left	10	act.tv	0.5	0.4	0.4	0.7		0.6
right	343	acting-man.com	0.594752	0.629738	0.61516	0.620991		0.825073
left	5	addictinginfo.org	0.4	0.2	0.2	1		0.8
right	96	adelaidenow.com.au	0.65625	0.65625	0.666667	0.6875		0.541667
left	414	advocate.com	0.905797	0.864734	0.855072	0.874396		0.961353
right	57	aei.org	0.631579	0.614035	0.631579	0.649123		0.684211
left	1	aidc.org.za	0	0	0	1		1
right	93	aim.org	0.473118	0.634409	0.666667	0.537634		0.774194
right	148	aina.org	0.756757	0.763514	0.797297	0.743243		0.858108
right	39	alec.org	0.564103	0.641026	0.564103	0.589744		0.589744
left	241	allthatsfab.com	0.560166	0.431535	0.460581	0.614108		0.593361
left	314	alternet.org	0.681529	0.579618	0.60828	0.754777		0.818471
left	59	americablog.com	0.508475	0.389831	0.474576	0.59322		0.610169
right	94	americanmilitarynews.com	0.585106	0.595745	0.670213	0.510638		0.585106
left	360	americanprogress.org	0.697222	0.616667	0.636111	0.755556		0.763889
right	98	americanthinker.com	0.510204	0.530612	0.489796	0.530612		0.693878
right	719	ammoland.com	0.773296	0.83032	0.849791	0.820584		0.93185
left	55	antifascistnews.net	0.563636	0.636364	0.509091	0.6		1
left	44	au.org	0.590909	0.522727	0.431818	0.636364		0.568182
left	792	autostraddle.com	0.776515	0.727273	0.699495	0.734848		0.957071
right	8	awm.com	0.375	0.625	0.625	0.125		0.125
right	65	bearingarms.com	0.553846	0.723077	0.707692	0.676923		0.769231
right	125	beinglibertarian.com	0.496	0.496	0.624	0.616		0.832
right	349	beliefnet.com	0.432665	0.452722	0.510029	0.498567		0.690544
right	13	biggovernment.news	0.384615	0.692308	0.615385	0.615385		0.692308
left	155	bitchmedia.org	0.709677	0.625806	0.690323	0.625806		0.922581
right	675	bizpacreview.com	0.558519	0.662222	0.663704	0.605926		0.798519
left	96	blackagendareport.com	0.625	0.625	0.614583	0.802083		0.958333
left	2	blacklivesmatter.com	0.5	0.5	0.5	0.5		1
right	1	bluelivesmatter.blue	0	1	1	1		1
left	26	bluenationreview.com	0.730769	0.5	0.5	0.807692		0.769231
left	1030	boingboing.net	0.625243	0.579612	0.573786	0.705825		0.796117
left	189	bradford-delong.com	0.57672	0.571429	0.571429	0.666667		0.703704
right	717	breitbart.com	0.527197	0.62622	0.651325	0.606695		0.754533
left	441	bust.com	0.741497	0.723356	0.657596	0.734694		0.875283
right	72	campaignlifecoalition.com	0.472222	0.541667	0.541667	0.513889		0.597222
right	197	campusreform.org	0.664975	0.690355	0.781726	0.720812		0.822335
right	596	canadafreepress.com	0.791946	0.840604	0.85906	0.815436		0.909396
left	158	canadiandimension.com	0.651899	0.639241	0.512658	0.746835		0.917722
right	48	capitalresearch.org	0.5	0.520833	0.645833	0.4375		0.770833
left	675	carbonated.tv	0.853333	0.865185	0.814815	0.918519		0.856296
right	5	carepublican.com	0.4	0.8	0.6	0.8		0.6
left	826	change.org	0.652542	0.590799	0.569007	0.690073		0.757869
left	510	chicagoreader.com	0.756863	0.713725	0.698039	0.715686		0.87451
right	410	christianpost.com	0.397561	0.390244	0.470732	0.434146		0.726829
right	45	chroniclesmagazine.org	0.533333	0.577778	0.622222	0.511111		0.822222
left	2	chroniclesofdemocracy.com	0.5	0.5	0.5	0.5		0
right	260	churchmilitant.com	0.584615	0.676923	0.707692	0.507692		0.857692
right	1	citizensunited.org	0	0	0	0		1
right	37	city-journal.org	0.594595	0.621622	0.675676	0.513514		0.621622
left	79	citypaper.com	0.772152	0.721519	0.696203	0.683544		0.898734
left	38	climaterealityproject.org	0.605263	0.578947	0.421053	0.578947		0.842105
left	440	cnn.com	0.795455	0.745455	0.781818	0.872727		0.759091
left	39	codepink.org	0.769231	0.717949	0.641026	0.717949		0.948718
right	2	colddeadhands.us	0.5	0	0.5	0		0.5
right	226	commentarymagazine.com	0.535398	0.557522	0.60177	0.473451		0.659292
left	592	commondreams.org	0.633446	0.543919	0.501689	0.646959		0.768581
right	86	conservativebase.com	0.44186	0.662791	0.581395	0.523256		0.872093
right	90	conservativedailynews.com	0.466667	0.588889	0.588889	0.466667		0.844444
right	123	conservativehq.com	0.788618	0.861789	0.837398	0.804878		0.95935
right	157	conservativereview.com	0.605096	0.66242	0.66879	0.585987		0.898089
right	157	conservativewoman.co.uk	0.535032	0.503185	0.66879	0.496815		0.828025
left	257	cosmopolitan.com	0.770428	0.66537	0.661479	0.7393		0.844358
left	238	countercurrents.org	0.705882	0.62605	0.563025	0.684874		0.852941
right	3	cowgernation.com	0.666667	0.666667	0.666667	0.666667		1
right	55	crimeresearch.org	0.454545	0.563636	0.527273	0.618182		0.672727
left	14	crimethinc.com	0.928571	0.714286	0.714286	0.785714		0.928571
left	41	crooked.com	0.731707	0.756098	0.731707	0.780488		0.878049
left	339	crooksandliars.com	0.707965	0.569322	0.59292	0.746313		0.746313
left	34	currentaffairs.org	0.676471	0.647059	0.441176	0.617647		0.794118
left	198	curvemag.com	0.70202	0.681818	0.651515	0.686869		0.909091
left	140	daily49er.com	0.671429	0.635714	0.535714	0.764286		0.65
right	465	dailycaller.com	0.701075	0.729032	0.735484	0.703226		0.772043
left	6	dailydems.com	0.5	0.333333	0.666667	0.833333		0.5
left	10	dailykos.com	0.4	0.4	0.5	0.6		0.8
right	125	dailymail.co.uk	0.632	0.712	0.632	0.704		0.816
right	269	dailysabah.com	0.817844	0.832714	0.873606	0.855019		0.884758
right	102	dailysignal.com	0.45098	0.617647	0.627451	0.5		0.705882
right	195	dailytelegraph.com.au	0.584615	0.589744	0.641026	0.564103		0.687179
right	310	dailywire.com	0.712903	0.758065	0.758065	0.712903		0.793548
left	35	dallasvoice.com	0.857143	0.714286	0.657143	0.771429		0.914286
right	141	dangerous.com	0.58156	0.666667	0.58156	0.64539		0.794326
right	44	dcstatesman.com	0.477273	0.636364	0.613636	0.522727		0.613636
right	63	dcwhispers.com	0.539683	0.650794	0.587302	0.619048		0.730159
left	206	deadspin.com	0.723301	0.582524	0.616505	0.703883		0.830097
left	190	deadstate.org	0.621053	0.494737	0.552632	0.663158		0.673684
right	219	debatepost.com	0.575342	0.6621	0.730594	0.6621		0.726027
left	72	deepleftfield.info	0.444444	0.388889	0.25	0.611111		0.527778
right	90	defenddemocracy.org	0.733333	0.733333	0.744444	0.711111		0.811111
left	4	democracyguardian.com	0.5	0.25	0.75	0.75		0.25
left	451	democracynow.org	0.694013	0.576497	0.576497	0.747228		0.804878
left	32	democratichub.com	0.75	0.625	0.59375	0.875		0.78125
left	947	democraticunderground.com	0.632524	0.599789	0.556494	0.712777		0.765576
left	191	desmogblog.com	0.539267	0.434555	0.507853	0.670157		0.717277
left	178	dieharddemocrat.com	0.617978	0.561798	0.617978	0.814607		0.713483
right	36	disobedientmedia.com	0.611111	0.694444	0.638889	0.527778		0.472222
left	67	dissentmagazine.org	0.835821	0.716418	0.761194	0.686567		0.865672
left	298	earthfirstjournal.org	0.798658	0.765101	0.667785	0.755034		0.902685
left	96	ebar.com	0.854167	0.770833	0.78125	0.864583		0.875
left	74	egbertowillies.com	0.486486	0.405405	0.486486	0.662162		0.513514
left	368	electronicintifada.net	0.855978	0.752717	0.790761	0.861413		0.929348
left	26	elisabethparker.com	0.692308	0.384615	0.230769	0.692308		0.807692
left	478	elitedaily.com	0.661088	0.623431	0.550209	0.748954		0.792887
right	270	en.mehrnews.com	0.6	0.707407	0.740741	0.685185		0.751852
right	1	energycitizens.org	1	1	1	1		1
right	109	erlc.com	0.633028	0.522936	0.651376	0.522936		0.844037
left	356	esquire.com	0.699438	0.691011	0.598315	0.741573		0.839888
left	17	evonomics.com	0.588235	0.529412	0.588235	0.647059		0.352941
right	862	express.co.uk	0.599768	0.686775	0.74826	0.722738		0.802784
left	14	extranewsfeed.com	0.642857	0.571429	0.5	0.714286		0.857143
right	156	faithwire.com	0.544872	0.461538	0.538462	0.461538		0.814103
right	19	federalistpress.com	0.473684	0.526316	0.473684	0.631579		0.684211
right	13	fedsoc.org	0.769231	0.846154	0.769231	0.692308		0.615385
left	178	feministcurrent.com	0.58427	0.47191	0.573034	0.567416		0.808989
left	166	feministing.com	0.680723	0.548193	0.608434	0.650602		0.891566
right	153	ff.org	0.581699	0.627451	0.588235	0.509804		0.830065
left	198	filmingcops.com	0.60101	0.510101	0.535354	0.686869		0.570707
left	815	firstpost.com	0.823313	0.802454	0.770552	0.8		0.797546
right	179	firstthings.com	0.648045	0.648045	0.614525	0.575419		0.715084
left	73	foreignpolicyjournal.com	0.60274	0.547945	0.534247	0.643836		0.60274
left	65	foreignpolicynews.org	0.707692	0.676923	0.692308	0.8		0.676923
right	223	foxnews.com	0.775785	0.807175	0.843049	0.7713		0.843049
right	677	freebeacon.com	0.542097	0.660266	0.688331	0.680945		0.747415
right	18	freedomcrossroads.com	0.722222	0.555556	0.666667	0.777778		0.888889
left	78	freedomnews.org.uk	0.666667	0.74359	0.769231	0.717949		0.833333
right	43	freedomworks.org	0.465116	0.674419	0.55814	0.511628		0.697674
left	72	freepress.org	0.597222	0.513889	0.597222	0.638889		0.736111
right	231	freewestmedia.com	0.718615	0.831169	0.818182	0.748918		0.909091
left	80	front.moveon.org	0.6125	0.5625	0.6	0.75		0.8625
right	3	gatestoneinstitute.org	0.333333	0.666667	0.333333	0.666667		0.666667
right	27	getreligion.org	0.481481	0.555556	0.518519	0.407407		0.740741
left	233	gizmodo.com	0.669528	0.703863	0.618026	0.755365		0.858369
left	39	good.is	0.769231	0.692308	0.641026	0.769231		0.692308
right	34	gop.com	0.735294	0.735294	0.617647	0.382353		0.529412
right	194	gopusa.com	0.716495	0.876289	0.85567	0.819588		0.891753
left	140	gq.com	0.735714	0.721429	0.664286	0.735714		0.857143
left	593	greenleft.org.au	0.937605	0.908938	0.88027	0.925801		0.961214
left	347	guardianlv.com	0.608069	0.570605	0.48415	0.677233		0.541787
right	229	heartland.org	0.71179	0.689956	0.703057	0.68559		0.80786
right	183	heritage.org	0.781421	0.693989	0.73224	0.612022		0.743169
right	6	hillarydaily.com	0.333333	0.333333	0.5	0.5		0.833333
right	213	hoover.org	0.615023	0.615023	0.638498	0.643192		0.723005
right	401	hotair.com	0.825436	0.852868	0.850374	0.812968		0.880299
right	131	hudson.org	0.709924	0.80916	0.740458	0.763359		0.816794
left	1	huffingtonpost.com	1	1	1	0		0
right	8	humanevents.com	0.875	0.5	0.5	0.375		0.875
right	13	ifstudies.org	0.538462	0.538462	0.615385	0.615385		0.769231
right	345	ijr.com	0.481159	0.576812	0.562319	0.524638		0.684058
right	53	illinoispolicy.org	0.622642	0.566038	0.566038	0.660377		0.679245
right	20	imprimis.hillsdale.edu	0.75	0.6	0.7	0.65		0.95
right	239	independentsentinel.com	0.543933	0.67364	0.694561	0.589958		0.753138
right	450	intellectualtakeout.org	0.602222	0.72	0.713333	0.653333		0.777778
left	1	internationalviewpoint.org	0	0	0	1		1
left	343	inthesetimes.com	0.6793	0.635569	0.586006	0.664723		0.932945
left	19	intrepidreport.com	0.526316	0.473684	0.526316	0.578947		0.526316
left	112	iowastartingline.com	0.642857	0.5625	0.517857	0.741071		0.633929
left	4	ips-dc.org	1	0.75	0.75	1		0.75
left	10	ir.net	0.3	0.1	0.1	0.6		0.4
left	414	itsgoingdown.org	0.789855	0.768116	0.68599	0.768116		0.966184
right	97	iwf.org	0.515464	0.525773	0.701031	0.608247		0.71134
left	68	jacobinmag.com	0.764706	0.764706	0.691176	0.705882		0.867647
right	289	jewishworldreview.com	0.539792	0.543253	0.564014	0.574394		0.757785
left	320	jezebel.com	0.690625	0.584375	0.621875	0.728125		0.85
left	416	juancole.com	0.694712	0.612981	0.701923	0.831731		0.889423
right	1	judicialnetwork.com	0	1	0	0		0
right	4	judicialwatch.org	0.25	1	0.5	0.5		1
right	5	kansaspolicy.org	0.6	0.4	0.6	0		0.8
right	8	knoxreport.com	0.5	0.5	0.5	0.5		0.875
left	215	latest.com	0.646512	0.534884	0.604651	0.702326		0.706977
left	381	lavendermagazine.com	0.784777	0.766404	0.732283	0.816273		0.853018
left	1	leftaction.com	0	0	0	0		0
left	30	leftfootforward.org	0.966667	0.966667	0.966667	1		1
left	3	leftscoop.com	0.666667	0	0.333333	1		0.333333
left	2	leftsideofhistory.com	0.5	0.5	0	1		1
left	28	leftvoice.org	0.785714	0.714286	0.571429	0.714286		1
right	629	legalinsurrection.com	0.694754	0.771065	0.766296	0.766296		0.828299
left	215	lgbtqnation.com	0.748837	0.604651	0.586047	0.688372		0.72093
left	404	libcom.org	0.858911	0.809406	0.816832	0.829208		0.923267
left	5	liberalamerica.org	0.6	0.4	0.8	0.8		0.8
left	14	liberalexaminer.com	0.428571	0.357143	0.428571	0.571429		0.5
left	210	liberationnews.org	0.866667	0.766667	0.72381	0.785714		0.942857
right	5	libertyhangout.org	0.6	0.6	1	0.8		0.8
right	269	libertyheadlines.com	0.724907	0.758364	0.754647	0.747212		0.862454
right	120	libertytalk.fm	0.741667	0.716667	0.791667	0.741667		0.833333
right	283	lifesitenews.com	0.473498	0.501767	0.59364	0.498233		0.749117
right	85	lifezette.com	0.376471	0.341176	0.552941	0.470588		0.788235
left	192	littlegreenfootballs.com	0.65625	0.541667	0.536458	0.703125		0.703125
right	593	louderwithcrowder.com	0.647555	0.726813	0.72344	0.733558		0.822934
left	1	loveknowledge.org	1	1	1	1		1
left	120	marxist.com	0.75	0.675	0.675	0.775		0.833333
left	208	mashable.com	0.605769	0.615385	0.528846	0.644231		0.75
left	68	meanlefthook.com	0.882353	0.808824	0.720588	0.955882		0.897059
right	18	mediacircus.com	0.444444	0.666667	0.5	0.555556		0.555556
right	107	mediaequalizer.com	0.588785	0.635514	0.579439	0.598131		0.775701
left	285	mediaite.com	0.614035	0.547368	0.592982	0.74386		0.754386
left	184	mediamatters.org	0.532609	0.445652	0.456522	0.717391		0.608696
left	21	meduza.io	0.47619	0.666667	0.571429	0.666667		0.761905
right	170	mercatornet.com	0.447059	0.476471	0.541176	0.482353		0.688235
left	634	miaminewtimes.com	0.73817	0.698738	0.700315	0.694006		0.888013
left	408	middleeastmonitor.com	0.715686	0.703431	0.642157	0.821078		0.705882
left	18	mirror.co.uk	0.777778	0.722222	0.666667	0.833333		0.666667
left	32	modernliberals.com	0.625	0.5625	0.59375	0.65625		0.65625
left	2	molad.org	1	1	0	0.5		0.5
left	338	mondoweiss.net	0.698225	0.62426	0.674556	0.668639		0.792899
left	13	moonofalabama.org	0.615385	0.538462	0.538462	0.846154		0.846154
left	39	morningstaronline.co.uk	0.487179	0.128205	0.25641	0.25641		0.179487
right	257	mrc.org	0.867704	0.856031	0.840467	0.867704		0.898833
left	400	msnbc.com	0.7	0.7025	0.6975	0.82		0.75
right	549	nationalreview.com	0.717668	0.750455	0.785064	0.757741		0.846995
left	288	nationofchange.org	0.725694	0.690972	0.628472	0.770833		0.829861
right	292	newbostonpost.com	0.650685	0.75	0.736301	0.743151		0.791096
left	558	newint.org	0.802867	0.759857	0.74552	0.750896		0.894265
left	58	newpol.org	0.603448	0.586207	0.568966	0.568966		0.741379
left	235	newrepublic.com	0.621277	0.604255	0.574468	0.753191		0.782979
right	2	newrevolutionnow.org	0.5	0.5	1	0.5		1
left	33	news.groopspeak.com	0.515152	0.515152	0.484848	0.818182		0.69697
right	719	newsbusters.org	0.801113	0.842837	0.845619	0.828929		0.859527
left	234	newscorpse.com	0.863248	0.82906	0.858974	0.944444		0.871795
left	95	newshounds.us	0.673684	0.526316	0.589474	0.768421		0.705263
left	55	newslogue.com	0.545455	0.418182	0.472727	0.618182		0.818182
right	790	newsmax.com	0.637975	0.694937	0.775949	0.68481		0.816456
left	683	newstatesman.com	0.821376	0.819912	0.717423	0.808199		0.737921
left	558	newyorker.com	0.87276	0.853047	0.818996	0.933692		0.94086
left	11	north99.org	0.272727	0.363636	0.454545	0.727273		0.545455
right	53	notliberal.com	0.660377	0.698113	0.716981	0.716981		0.943396
left	81	nowthisnews.com	0.666667	0.679012	0.592593	0.802469		0.728395
left	251	nowtoronto.com	0.840637	0.772908	0.772908	0.788845		0.956175
right	54	numbersusa.com	0.555556	0.759259	0.611111	0.5		0.777778
left	490	nymag.com	0.706122	0.671429	0.697959	0.742857		0.797959
right	63	oann.com	0.587302	0.571429	0.555556	0.555556		0.619048
right	466	observer.com	0.358369	0.401288	0.502146	0.527897		0.388412
right	45	offgridsurvival.com	0.711111	0.777778	0.8	0.8		0.688889
right	124	onenewsnow.com	0.854839	0.91129	0.935484	0.903226		0.967742
left	594	opednews.com	0.632997	0.599327	0.558923	0.6633		0.781145
right	166	opslens.com	0.415663	0.39759	0.5	0.403614		0.777108
right	704	order-order.com	0.690341	0.740057	0.75	0.715909		0.862216
left	21	other98.com	0.571429	0.571429	0.52381	0.666667		0.761905
left	48	ourvoiceny.com	0.5625	0.4375	0.541667	0.791667		0.854167
left	161	palestinechronicle.com	0.745342	0.602484	0.540373	0.645963		0.68323
left	50	palmerreport.com	0.56	0.54	0.62	0.64		0.7
left	670	pastemagazine.com	0.832836	0.78806	0.761194	0.797015		0.889552
right	113	patriotpost.us	0.814159	0.814159	0.858407	0.80531		0.955752
left	119	peacock-panache.com	0.831933	0.773109	0.789916	0.857143		0.823529
left	9	people.com	0.666667	0.888889	0.777778	1		0.666667
left	65	pfaw.org	0.538462	0.538462	0.523077	0.707692		0.8
left	3	photographyisnotacrime.com	0.666667	0.333333	0.333333	0.333333		0.333333
right	208	pjmedia.com	0.610577	0.745192	0.716346	0.735577		0.8125
right	120	politicsnote.com	0.666667	0.75	0.741667	0.658333		0.8
left	671	popularresistance.org	0.813711	0.771982	0.742176	0.80775		0.923994
right	3	powerlineblog.com	1	1	1	1		1
left	72	pravdareport.com	0.666667	0.625	0.513889	0.694444		0.652778
left	1	pressprogress.ca	0	0	0	0		0
left	116	progressivearmy.com	0.517241	0.474138	0.508621	0.62931		0.784483
left	61	progressiveliberal.net	0.508197	0.508197	0.442623	0.672131		0.57377
left	13	projectcensored.org	0.846154	0.923077	0.923077	0.923077		0.923077
right	38	projectveritas.com	0.578947	0.789474	0.526316	0.684211		0.657895
left	176	prospect.org	0.693182	0.647727	0.681818	0.755682		0.823864
left	97	proudemocrat.com	0.556701	0.42268	0.463918	0.701031		0.57732
left	58	prwatch.org	0.551724	0.5	0.551724	0.62069		0.810345
right	46	quadrant.org.au	0.521739	0.5	0.586957	0.586957		0.73913
left	170	queerty.com	0.711765	0.558824	0.705882	0.752941		0.8
left	870	rabble.ca	0.794253	0.78046	0.781609	0.816092		0.916092
left	72	rantt.com	0.625	0.569444	0.569444	0.763889		0.652778
left	303	rappler.com	0.79538	0.768977	0.735974	0.811881		0.825083
right	294	rd.com	0.442177	0.367347	0.530612	0.568027		0.408163
left	10	readersupportednews.org	0.7	0.5	0.7	0.7		0.8
right	69	redflagnews.com	0.507246	0.652174	0.608696	0.536232		0.652174
left	38	redpepper.org.uk	0.736842	0.657895	0.578947	0.578947		0.947368
right	339	redstate.com	0.539823	0.575221	0.575221	0.542773		0.722714
right	9	redstatewatcher.com	0.777778	0.777778	0.888889	0.444444		0.444444
left	55	redyouth.org	0.763636	0.763636	0.654545	0.727273		0.909091
right	2	renewedright.com	1	1	1	1		1
left	23	republicanssucks.org	0.478261	0.478261	0.391304	0.695652		0.869565
left	383	revcom.us	0.874674	0.81201	0.832898	0.780679		0.979112
left	28	reverbpress.com	0.5	0.357143	0.285714	0.464286		0.464286
right	543	ricochet.com	0.384899	0.423573	0.453039	0.464088		0.740331
left	105	rightwingwatch.org	0.838095	0.790476	0.819048	0.92381		0.819048
right	78	ronpaulinstitute.org	0.551282	0.641026	0.717949	0.551282		0.666667
right	59	ronpaullibertyreport.com	0.576271	0.711864	0.627119	0.508475		0.779661
left	512	salon.com	0.664062	0.650391	0.59375	0.775391		0.796875
left	76	samefacts.com	0.618421	0.618421	0.552632	0.684211		0.671053
left	89	samuel-warde.com	0.685393	0.494382	0.494382	0.719101		0.719101
right	104	savejersey.com	0.586538	0.528846	0.596154	0.557692		0.663462
left	206	scarymommy.com	0.708738	0.645631	0.660194	0.728155		0.830097
right	8	secureamericanow.org	0.75	0.75	0.375	0.5		0.625
right	88	sentinelksmo.org	0.352273	0.295455	0.534091	0.318182		0.659091
left	148	shareblue.com	0.648649	0.554054	0.682432	0.736486		0.743243
left	474	slate.com	0.797468	0.687764	0.723629	0.793249		0.797468
left	202	socialistworker.org	0.732673	0.678218	0.60396	0.663366		0.940594
right	116	sonorannews.com	0.474138	0.465517	0.508621	0.474138		0.715517
left	37	sourcewatch.org	0.513514	0.378378	0.405405	0.621622		0.810811
right	373	spectator.org	0.63807	0.632708	0.761394	0.648794		0.841823
right	184	spiked-online.com	0.559783	0.625	0.668478	0.657609		0.548913
left	101	splinternews.com	0.762376	0.762376	0.772277	0.861386		0.861386
right	47	standpointmag.co.uk	0.468085	0.468085	0.617021	0.489362		0.702128
left	1	stpete4peace.org	1	1	0	0		1
left	6	syriana-analysis.com	0.333333	0.833333	0.666667	0.666667		0.166667
left	365	takepart.com	0.8	0.720548	0.684932	0.79726		0.791781
left	246	talkingpointsmemo.com	0.634146	0.573171	0.646341	0.723577		0.565041
right	39	tasnimnews.com	0.538462	0.615385	0.589744	0.435897		0.769231
right	26	teapartypatriots.org	0.653846	0.615385	0.807692	0.615385		0.769231
right	223	teapartytribune.com	0.547085	0.600897	0.533632	0.506726		0.7713
right	322	tehrantimes.com	0.636646	0.65528	0.717391	0.618012		0.785714
left	540	telesurtv.net	0.712963	0.553704	0.694444	0.672222		0.724074
right	308	tennesseestar.com	0.733766	0.795455	0.853896	0.743506		0.928571
right	2	theamericancause.org	0.5	0.5	0.5	1		1
right	701	theblaze.com	0.667618	0.74893	0.757489	0.746077		0.824536
left	24	theburningspear.com	0.75	0.875	0.708333	0.833333		1
left	325	thecanary.co	0.836923	0.772308	0.790769	0.84		0.849231
right	15	thecitizenpress.com	0.266667	0.6	0.466667	0.4		0.6
right	87	thecollegefix.com	0.678161	0.735632	0.758621	0.666667		0.827586
right	623	theconservativetreehouse.com	0.462279	0.518459	0.539326	0.536116		0.696629
left	389	thedailybanter.com	0.547558	0.51928	0.568123	0.735219		0.763496
left	57	thedailybeast.com	0.666667	0.701754	0.614035	0.719298		0.631579
right	133	thedailyliberator.com	0.736842	0.744361	0.774436	0.744361		0.81203
left	169	thedailyvox.co.za	0.828402	0.692308	0.710059	0.704142		0.863905
left	33	theestablishment.co	0.515152	0.727273	0.575758	0.666667		0.909091
left	4	thefingnews.com	0.75	0.75	0.25	0.75		0.75
left	45	thefloridasqueeze.com	0.577778	0.511111	0.577778	0.644444		0.755556
left	882	thegrio.com	0.809524	0.739229	0.730159	0.783447		0.797052
left	237	theguardiansofdemocracy.com	0.64135	0.540084	0.57384	0.776371		0.691983
left	128	thelasource.com	0.671875	0.671875	0.664062	0.726562		0.921875
left	53	thelily.com	0.754717	0.735849	0.754717	0.811321		0.754717
left	410	thelondoneconomic.com	0.692683	0.678049	0.604878	0.780488		0.580488
left	629	themarysue.com	0.689984	0.645469	0.629571	0.670906		0.855326
left	220	themaven.net	0.531818	0.509091	0.531818	0.636364		0.595455
left	35	themilitant.com	0.857143	0.714286	0.657143	0.771429		0.971429
right	2	themilreview.com	0.5	0.5	0.5	0.5		1
left	370	thenation.com	0.735135	0.675676	0.621622	0.740541		0.854054
right	5	thenewamerican.com	0.6	0.8	0.8	0.6		0.2
left	14	theoswatch.com	0.642857	0.285714	0.428571	0.642857		0.142857
left	80	theoutline.com	0.7125	0.825	0.6375	0.8		0.825
right	1	thepoliticalinsider.com	1	1	1	1		1
right	367	thepostemail.com	0.621253	0.697548	0.580381	0.623978		0.817439
right	6	therantidote.com	0.333333	0	0.333333	0.333333		0.833333
right	342	therebel.media	0.795322	0.792398	0.839181	0.830409		0.842105
right	22	theresurgent.com	0.409091	0.363636	0.5	0.363636		0.818182
right	548	therightscoop.com	0.905109	0.936131	0.95438	0.908759		0.979927
left	387	theroot.com	0.692506	0.589147	0.666667	0.767442		0.801034
left	1	thesternfacts.com	0	1	1	1		0
right	1385	thesun.co.uk	0.626715	0.658484	0.719134	0.706859		0.837545
left	269	thewalrus.ca	0.743494	0.765799	0.732342	0.739777		0.951673
left	271	thinkprogress.org	0.553506	0.509225	0.450185	0.671587		0.630996
left	60	this.org	0.8	0.7	0.7	0.716667		0.933333
right	85	torontosun.com	0.717647	0.788235	0.835294	0.811765		0.847059
left	554	towleroad.com	0.774368	0.693141	0.711191	0.779783		0.83574
right	689	townhall.com	0.850508	0.894049	0.892598	0.896952		0.946299
left	58	tribunemagazine.org	0.62069	0.637931	0.689655	0.689655		0.448276
left	80	trofire.com	0.7	0.7	0.625	0.7625		0.825
right	437	trtworld.com	0.572082	0.599542	0.668192	0.617849		0.668192
left	155	truthdig.com	0.580645	0.535484	0.612903	0.703226		0.696774
right	206	twitchy.com	0.791262	0.805825	0.815534	0.776699		0.859223
right	324	unionleader.com	0.459877	0.503086	0.580247	0.496914		0.759259
right	75	unwatch.org	0.506667	0.56	0.56	0.56		0.506667
left	680	uproxx.com	0.738235	0.654412	0.673529	0.716176		0.863235
left	1	upworthy.com	0	1	1	1		1
right	28	ussanews.com	0.464286	0.357143	0.607143	0.607143		0.678571
left	427	vanityfair.com	0.747073	0.700234	0.639344	0.758782		0.763466
right	84	vivaliberty.com	0.642857	0.809524	0.892857	0.869048		0.869048
left	79	vote.us.org	0.531646	0.493671	0.443038	0.683544		0.64557
left	52	washingtonpress.com	0.673077	0.480769	0.557692	0.711538		0.673077
left	9	washingtonsources.org	0.333333	0.555556	0.222222	0.666667		0.555556
right	314	weaselzippers.us	0.570064	0.636943	0.605096	0.61465		0.748408
right	14	westernjournalism.com	0.642857	0.785714	0.785714	0.642857		0.857143
right	1	whatfinger.com	1	1	1	1		1
left	18	whatmattersnews.com	0.611111	0.333333	0.444444	0.722222		0.611111
left	251	whowhatwhy.org	0.645418	0.661355	0.581673	0.752988		0.828685
right	392	wnd.com	0.602041	0.69898	0.696429	0.619898		0.875
left	283	wonkette.com	0.519435	0.522968	0.522968	0.689046		0.699647
left	295	workers.org	0.786441	0.667797	0.691525	0.752542		0.972881
right	502	world.wng.org	0.486056	0.507968	0.595618	0.573705		0.727092
left	29	worldcantwait.net	0.896552	0.827586	0.655172	0.724138		0.965517
left	3	worldsocialism.org	1	1	1	1		0.666667
right	39	worldtribune.com	0.641026	0.641026	0.512821	0.333333		0.153846
left	216	wsws.org	0.75	0.722222	0.671296	0.773148		0.856481
right	48	yaf.org	0.479167	0.458333	0.583333	0.541667		0.875
right	414	yellowhammernews.com	0.591787	0.661836	0.71256	0.555556		0.830918
left	189	yesmagazine.org	0.830688	0.740741	0.78836	0.777778		0.925926
