# Supplementary material
Source: ML conference proceedings conference paper supplement (https://proceedings.neurips.cc/paper_files/paper/2019/hash/e4dd5528f7596dcdf871aa55cfccc53c-Abstract.html)
Supplement: Supplementary file 30 [file media_source_stats.xlsx]

## Sheet: media_source_stats
Leaning	Media Source	Deduplicated Count
left	rappler.com	14047
right	thesun.co.uk	13597
left	dailykos.com	13047
left	firstpost.com	11763
left	democraticunderground.com	11629
right	dailycaller.com	11384
left	thegrio.com	11248
left	boingboing.net	11145
left	change.org	10210
left	newstatesman.com	9949
right	theconservativetreehouse.com	9898
left	autostraddle.com	9873
right	express.co.uk	9740
right	bizpacreview.com	9701
right	freebeacon.com	9527
left	uproxx.com	9331
left	msnbc.com	9169
left	rabble.ca	9156
right	nationalreview.com	9002
right	trtworld.com	8641
left	newyorker.com	8445
left	opednews.com	8269
right	newsmax.com	8266
left	chicagoreader.com	8236
left	motherjones.com	7967
right	newsbusters.org	7768
left	carbonated.tv	7755
left	pastemagazine.com	7721
left	popularresistance.org	7656
left	telesurtv.net	7615
left	miaminewtimes.com	7465
left	themarysue.com	7393
right	townhall.com	7331
left	thenation.com	7286
right	beliefnet.com	7277
right	ammoland.com	7267
right	order-order.com	7201
right	theblaze.com	7171
right	twitchy.com	7121
left	cnn.com	7111
left	commondreams.org	7061
right	breitbart.com	7047
left	greenleft.org.au	6992
right	legalinsurrection.com	6962
left	salon.com	6779
left	newint.org	6716
left	advocate.com	6677
left	wonkette.com	6516
left	towleroad.com	6313
left	littlegreenfootballs.com	6297
left	talkingpointsmemo.com	6199
right	observer.com	6118
right	ricochet.com	6011
right	canadafreepress.com	5855
left	newrepublic.com	5804
right	therightscoop.com	5791
right	louderwithcrowder.com	5757
left	thelondoneconomic.com	5661
right	teapartytribune.com	5622
left	esquire.com	5604
right	intellectualtakeout.org	5452
left	elitedaily.com	5422
right	redstatewatcher.com	5407
left	queerty.com	5404
left	democracynow.org	5397
left	nowtoronto.com	5390
left	bust.com	5340
left	nymag.com	5277
left	slate.com	5257
left	itsgoingdown.org	5218
right	world.wng.org	5155
left	vox.com	5136
right	wnd.com	5101
right	dailysabah.com	5077
right	en.mehrnews.com	5019
left	cosmopolitan.com	4919
left	thecanary.co	4902
left	lavendermagazine.com	4899
left	libcom.org	4851
left	vanityfair.com	4820
left	electronicintifada.net	4729
right	weeklystandard.com	4678
left	inthesetimes.com	4652
left	trofire.com	4609
right	tehrantimes.com	4576
left	revcom.us	4543
left	middleeastmonitor.com	4515
left	thedailybanter.com	4470
right	dailytelegraph.com.au	4462
right	redstate.com	4439
left	mirror.co.uk	4413
left	crooksandliars.com	4399
left	lgbtqnation.com	4314
left	theroot.com	4306
right	spectator.org	4296
right	yellowhammernews.com	4294
left	alternet.org	4263
right	lifesitenews.com	4232
left	workers.org	4210
left	juancole.com	4166
left	americanprogress.org	4133
right	christianpost.com	4061
right	hotair.com	3986
right	tennesseestar.com	3981
right	hoover.org	3938
left	nationalmemo.com	3921
right	dailywire.com	3903
right	ijr.com	3900
left	takepart.com	3891
right	thepostemail.com	3867
right	therebel.media	3863
left	nationofchange.org	3819
left	jezebel.com	3801
left	truthdig.com	3774
left	guardianlv.com	3759
left	gq.com	3719
right	acting-man.com	3692
right	unionleader.com	3665
right	churchmilitant.com	3578
left	earthfirstjournal.org	3567
left	mondoweiss.net	3535
right	rd.com	3520
right	foxnews.com	3461
right	weaselzippers.us	3387
right	newbostonpost.com	3386
left	liberationnews.org	3371
right	mercatornet.com	3313
left	yesmagazine.org	3297
right	adelaidenow.com.au	3287
left	liberalamerica.org	3137
right	jewishworldreview.com	3128
left	thedailyvox.co.za	3098
left	deadspin.com	3066
left	whowhatwhy.org	3060
left	thewalrus.ca	3016
left	mashable.com	3009
right	gopusa.com	3001
left	deadstate.org	2990
right	mrc.org	2962
right	spiked-online.com	2859
left	socialistworker.org	2840
right	heartland.org	2799
left	theguardiansofdemocracy.com	2788
right	savejersey.com	2746
left	mediaite.com	2737
right	libertyheadlines.com	2728
right	independentsentinel.com	2687
left	gizmodo.com	2656
left	thedailybeast.com	2621
right	pjmedia.com	2610
left	feministing.com	2595
left	filmingcops.com	2593
right	commentarymagazine.com	2581
left	themaven.net	2580
right	acculturated.com	2559
left	countercurrents.org	2473
left	palestinechronicle.com	2460
left	thinkprogress.org	2434
left	dailyrecord.co.uk	2418
left	allthatsfab.com	2393
right	freewestmedia.com	2390
left	latest.com	2371
left	prospect.org	2361
left	newscorpse.com	2325
right	powerlineblog.com	2315
right	campusreform.org	2313
left	samuel-warde.com	2268
left	wsws.org	2188
left	bradford-delong.com	2181
left	huffingtonpost.com	2169
left	mediamatters.org	2159
right	debatepost.com	2159
right	dangerous.com	2153
left	scarymommy.com	2090
right	conservativewoman.co.uk	2086
left	curvemag.com	2082
left	shareblue.com	2070
left	upworthy.com	2024
right	thecollegefix.com	2018
left	peacock-panache.com	1991
left	jacobinmag.com	1956
right	conservativebase.com	1953
right	dailysignal.com	1948
left	desmogblog.com	1942
right	heritage.org	1931
left	feministcurrent.com	1904
right	firstthings.com	1811
left	foreignpolicynews.org	1810
left	bitchmedia.org	1800
right	aina.org	1789
right	westernjournalism.com	1778
right	quadrant.org.au	1776
left	dallasvoice.com	1759
right	conservativereview.com	1756
right	thedailyliberator.com	1754
right	hudson.org	1751
left	dissentmagazine.org	1745
right	onenewsnow.com	1739
right	opslens.com	1713
right	patriotpost.us	1673
right	sonorannews.com	1667
left	dieharddemocrat.com	1653
right	americanmilitarynews.com	1637
left	bluenationreview.com	1631
right	faithwire.com	1528
right	dailymail.co.uk	1523
right	ussanews.com	1490
right	erlc.com	1470
left	meanlefthook.com	1449
left	canadiandimension.com	1446
left	daily49er.com	1438
right	libertytalk.fm	1424
right	lifezette.com	1414
right	conservativedailynews.com	1407
right	defenddemocracy.org	1393
left	marxist.com	1383
right	beinglibertarian.com	1380
right	ff.org	1365
right	cowgernation.com	1344
left	nowthisnews.com	1325
left	rightwingwatch.org	1307
left	ebar.com	1305
right	politicsnote.com	1259
left	thelasource.com	1249
left	rantt.com	1246
right	oann.com	1219
left	progressivearmy.com	1214
left	good.is	1213
left	iowastartingline.com	1213
left	moonofalabama.org	1203
left	proudemocrat.com	1202
right	ronpaulinstitute.org	1201
right	aim.org	1197
right	thetruthaboutguns.com	1168
left	smirkingchimp.com	1165
right	mediaequalizer.com	1163
right	aclj.org	1141
right	bearingarms.com	1094
right	ac2news.com	1091
left	splinternews.com	1089
left	blackagendareport.com	1083
right	conservativehq.com	1076
left	extranewsfeed.com	1071
left	theestablishment.co	1034
right	worldtribune.com	1010
left	newshounds.us	1006
right	capitalresearch.org	993
left	samefacts.com	974
left	theoutline.com	970
right	libertyhangout.org	970
left	front.moveon.org	960
right	americanthinker.com	954
left	progressiveliberal.net	943
left	freedomnews.org.uk	936
right	unwatch.org	934
right	torontosun.com	929
right	campaignlifecoalition.com	926
right	vivaliberty.com	924
left	egbertowillies.com	920
left	foreignpolicyjournal.com	915
right	redflagnews.com	910
right	sentinelksmo.org	863
left	freepress.org	852
left	citypaper.com	819
left	prwatch.org	806
left	vote.us.org	805
right	tasnimnews.com	790
right	crimeresearch.org	785
right	yaf.org	774
right	iwf.org	764
left	reverbpress.com	750
left	newpol.org	745
right	aei.org	737
left	washingtonpress.com	736
left	pravdareport.com	716
left	deepleftfield.info	713
left	pfaw.org	693
left	thelily.com	667
left	tribunemagazine.org	665
right	ibleedredwhiteblue.com	664
right	projectveritas.com	661
left	americablog.com	636
left	palmerreport.com	629
right	city-journal.org	626
left	globalvoices.org	606
left	redyouth.org	604
left	leftfootforward.org	597
left	antifascistnews.net	595
right	chroniclesmagazine.org	575
right	numbersusa.com	571
left	ourvoiceny.com	568
right	notliberal.com	554
right	disobedientmedia.com	548
left	newslogue.com	544
right	renewedright.com	537
right	freedomworks.org	535
left	morningstaronline.co.uk	529
left	au.org	528
left	codepink.org	526
left	this.org	518
left	democratichub.com	516
right	offgridsurvival.com	515
left	shadowproof.com	504
right	alec.org	503
right	ronpaullibertyreport.com	497
right	dcstatesman.com	491
left	redpepper.org.uk	485
left	thefloridasqueeze.com	482
right	dcwhispers.com	473
right	illinoispolicy.org	466
left	washingtonmonthly.com	464
left	politicususa.com	464
left	modernliberals.com	452
left	climaterealityproject.org	448
right	thepoliticalinsider.com	445
right	standpointmag.co.uk	440
right	thefederalist.com	436
left	act.tv	427
left	crooked.com	412
right	thecitizenpress.com	406
left	ips-dc.org	402
left	sourcewatch.org	396
left	news.groopspeak.com	378
right	teapartypatriots.org	376
left	democracychronicles.org	372
right	fedsoc.org	368
left	currentaffairs.org	357
left	other98.com	343
left	villagevoice.com	343
right	gop.com	316
left	themilitant.com	310
right	thehayride.com	310
left	evonomics.com	287
left	meduza.io	276
right	getreligion.org	275
left	republicanssucks.org	274
left	leftvoice.org	273
left	rawstory.com	270
left	dailydot.com	270
right	imprimis.hillsdale.edu	269
left	theburningspear.com	267
left	whatmattersnews.com	258
left	intrepidreport.com	256
left	worldcantwait.net	255
left	elisabethparker.com	239
left	dailydems.com	239
left	crimethinc.com	238
left	photographyisnotacrime.com	224
left	readersupportednews.org	222
right	ifstudies.org	219
right	theresurgent.com	213
left	projectcensored.org	209
left	theoswatch.com	198
left	liberalexaminer.com	194
left	counterpunch.org	194
right	mediacircus.com	189
right	federalistpress.com	183
right	ntknetwork.com	174
right	thenewamerican.com	166
right	freedomcrossroads.com	164
right	redalertpolitics.com	155
right	crisismagazine.com	154
right	hillarydaily.com	152
left	people.com	150
left	syriana-analysis.com	144
right	biggovernment.news	142
left	forwardprogressives.com	136
left	thenewcivilrightsmovement.com	131
left	wearyourvoicemag.com	119
right	politifeed.net	118
left	north99.org	117
right	lifenews.com	116
left	washingtonsources.org	114
right	awm.com	111
left	ir.net	108
left	everydayfeminism.com	105
right	tribunist.com	104
left	leftscoop.com	95
right	farleftwatch.com	90
left	americanbridgepac.org	89
left	vermontindependent.org	88
right	carepublican.com	88
right	secureamericanow.org	84
right	judicialwatch.org	83
right	americansforprosperity.org	79
left	tytnetwork.com	78
right	libertynation.com	72
left	rewire.news	71
right	nccivitas.org	68
right	knoxreport.com	64
left	molad.org	62
right	conservativeinstitute.org	55
left	worldsocialism.org	55
left	freespeech.org	54
right	humanevents.com	54
left	addictinginfo.org	54
right	therantidote.com	54
right	kansaspolicy.org	52
right	controversialtimes.com	50
left	blacklivesmatter.com	50
right	themilreview.com	49
left	cnntimes.online	48
left	chroniclesofdemocracy.com	44
right	bluelivesmatter.blue	43
right	brexitcentral.com	33
left	americannewsx.com	33
left	drudge.com	33
right	factsandlogic.org	32
left	democracyguardian.com	31
right	tpusa.com	30
left	stpete4peace.org	29
right	theamericancause.org	28
left	internationalviewpoint.org	27
left	politicaldig.com	25
left	thefingnews.com	25
left	akkadiantimes.com	24
left	leftoverrights.com	24
left	aidc.org.za	23
right	whatfinger.com	22
right	gatestoneinstitute.org	22
left	the-daily.buzz	20
right	hermancain.com	20
left	leftaction.com	19
left	leftsideofhistory.com	18
right	fightpp.org	17
left	deepstatenation.com	17
right	alphanewsmn.com	16
right	energycitizens.org	15
right	familysecuritymatters.org	14
right	westernfreepress.com	13
left	readingthepictures.org	13
right	drudgereport.com	12
left	breitbartunmasked.com	11
right	newrevolutionnow.org	11
right	bigleaguepolitics.com	10
right	aa.com.tr	10
left	truth-out.org	9
right	americanconsequences.com	8
left	verrit.com	8
right	christiannewsalerts.com	8
left	thesternfacts.com	7
right	chicksontheright.com	6
left	pressprogress.ca	6
right	judicialnetwork.com	6
right	colddeadhands.us	5
left	redstatedisaster.com	5
left	greenvillegazette.com	5
right	americanewshub.com	4
left	thefrisky.com	4
left	nap-sack.org	4
right	cscmediagroupus.com	3
left	theintellectualist.co	3
left	zcomm.org	3
right	heatst.com	2
left	truthagainstthemachine.com	2
left	merryjane.com	2
right	ontarioproud.ca	2
right	vesselnews.io	2
left	progressive.org	2
right	guerrilla.news	2
left	gopocalypse.org	2
right	g-a-i.org	2
right	deplorablesreport.com	1
left	leftwingnation.org	1
right	offendedamerica.com	1
right	thedailydefender.com	1
right	theblacksphere.net	1
right	politichicks.com	1
right	newlypress.com	1
right	youngcons.com	1
right	citizensunited.org	1
right	resistancemedia.org	1
right	americanewscentral.com	1
left	loveknowledge.org	1
left	americanindependent.com	1
right	nextnewsnetwork.com	1
