# Supplementary material
Source: ML conference proceedings conference paper supplement (https://proceedings.neurips.cc/paper_files/paper/2019/hash/e4dd5528f7596dcdf871aa55cfccc53c-Abstract.html)
Supplement: Supplementary file 31 [file topic_results.xlsx]

## Sheet: Sheet1
Test Set Count	Issue	Resnet	Joo	Human Concepts	Ours		Ours (GT)
5695	religion	0.664794	0.655663	0.663565	0.696752		0.789464
5383	immigration	0.678246	0.666914	0.669515	0.712985		0.802526
4984	Climate Change	0.693419	0.679575	0.676966	0.717897		0.808186
4658	terrorism	0.668527	0.668527	0.680335	0.699871		0.783383
4640	racism	0.680603	0.659052	0.668319	0.714009		0.79806
4383	abortion	0.656172	0.654803	0.657312	0.695414		0.795346
4343	Gun Control	0.676951	0.672577	0.680175	0.712871		0.800829
4284	Animal Rights	0.667834	0.667834	0.663632	0.705415		0.789916
4011	isis	0.67988	0.66891	0.671902	0.709549		0.784592
3860	black lives matter	0.702591	0.70285	0.706995	0.726943		0.83342
3821	Welfare	0.657158	0.663439	0.672861	0.700079		0.810259
3821	unemployment	0.673646	0.66213	0.676001	0.713164		0.798482
3772	Border Security	0.692206	0.679745	0.680541	0.716066		0.79719
3528	lgbt	0.682256	0.672052	0.673186	0.712018		0.809524
3468	blue lives matter	0.701269	0.695502	0.695502	0.730681		0.83564
3242	war on drugs	0.668415	0.659469	0.672424	0.712832		0.796422
2811	Minimum Wage	0.685521	0.684454	0.690146	0.727499		0.825685
1698	Fracking	0.673734	0.656655	0.652532	0.720848		0.816254
1660	Homelessness	0.695783	0.659639	0.68253	0.73012		0.826506
1086	Vaccines	0.676796	0.656538	0.658379	0.742173		0.778085
