# Supplementary material
Source: ML conference proceedings conference paper supplement (https://proceedings.neurips.cc/paper_files/paper/2019/hash/e4dd5528f7596dcdf871aa55cfccc53c-Abstract.html)
Supplement: Supplementary file [file e4dd5528f7596dcdf871aa55cfccc53c-Supplemental.zip]

# Predicting the Politics of an Image Using Webly Supervised Data

---

Christopher Thomas and Adriana Kovashka

Published in NeurIPS 2019

# OUTLINE

---

- **Problem introduction**
- Related research
- Dataset
- Our method
- Quantitative results
- Qualitative results

# PREDICTING VISUAL POLITICAL BIAS

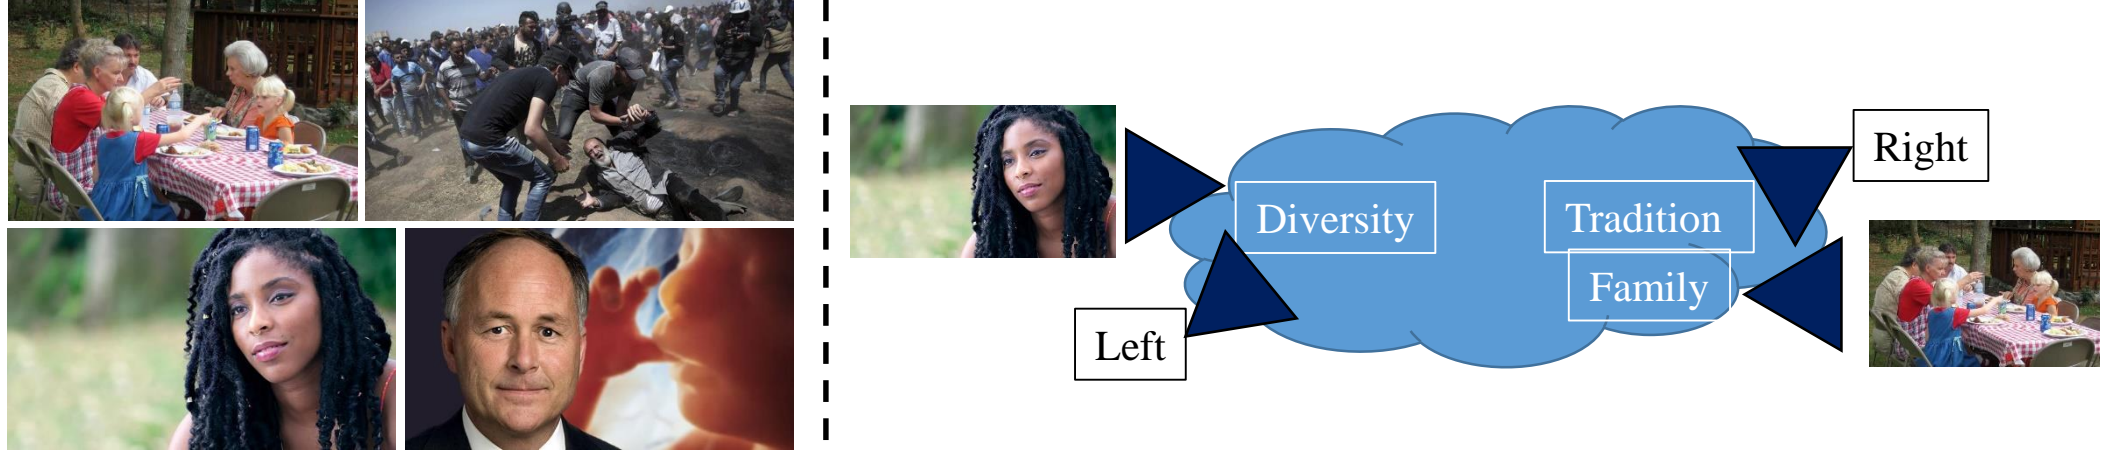

- We study predicting the **political leaning of an image**
- Certain political sides are associated with certain demographic groups, concepts, people, etc.
  - We want to see whether we can learn this automatically from the data
- Multimodal setting: images + paired *lengthy* text articles they appeared with
  - We are interested primarily in *visual* bias, not textual

# EXAMPLE IMAGES

?

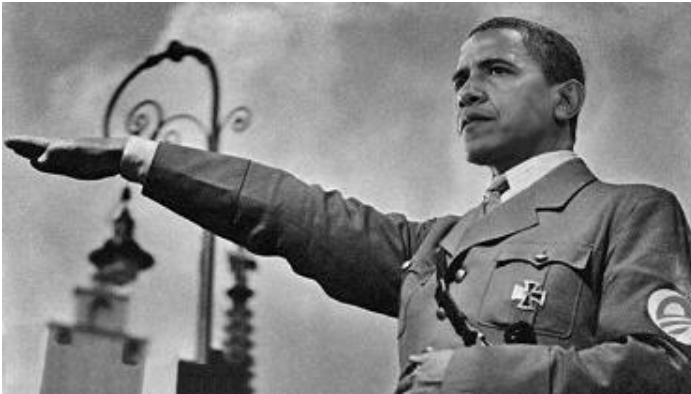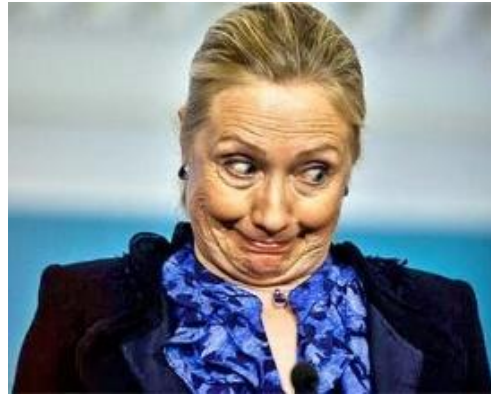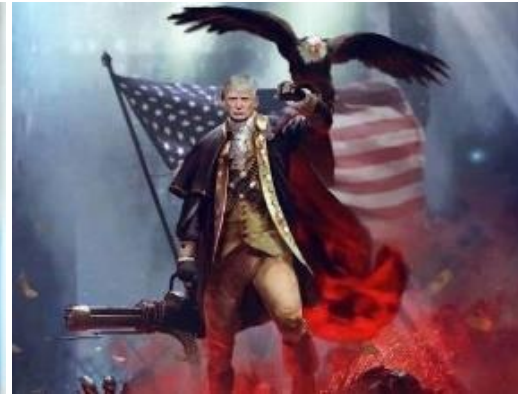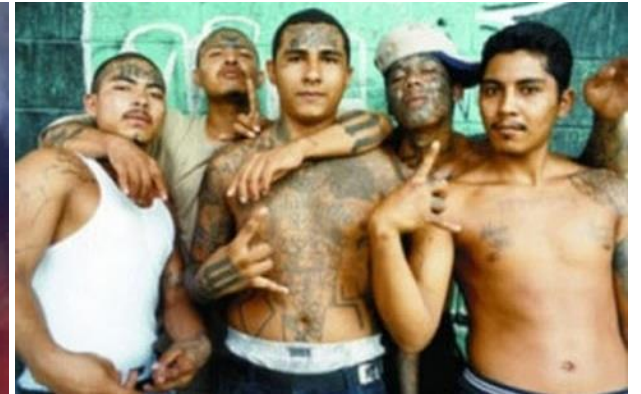

# OUTLINE

---

- Problem introduction
- **Related research**
- Dataset
- Our method
- Quantitative results
- Qualitative results

# RELATED RESEARCH – VISUAL PERSUASION

- Visual Persuasion: Inferring Communicative Intents of Images
- Uses facial attributes of known politicians to predict whether the image portrays them in a positive or negative light
- We compare against Joo et al. as a baseline
- In contrast, we don't use human chosen attributes / features; instead we leverage the implicit semantics in the auxiliary text domain to guide training

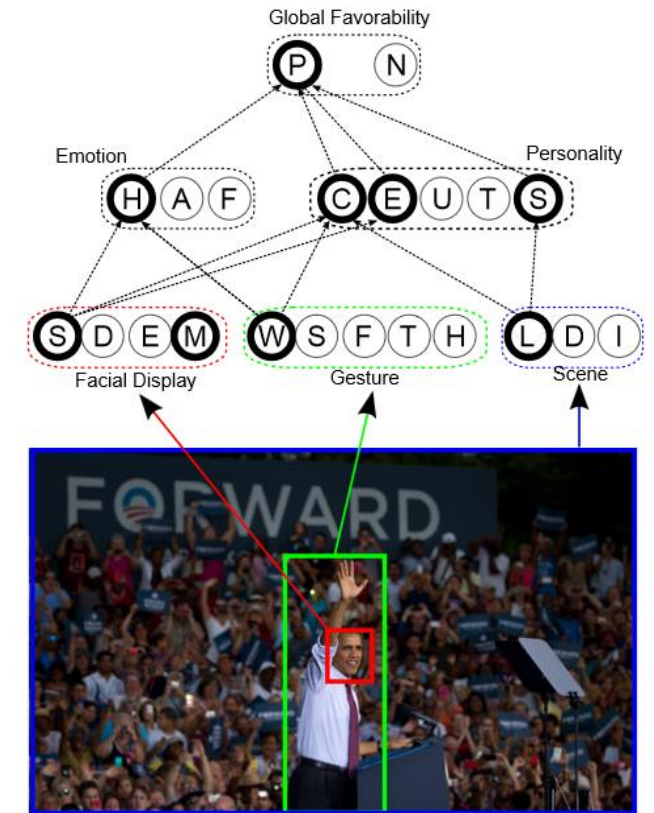

**Modeling Persuasive Intents**  
Joo et al., 2014

# RELATED RESEARCH – POLITICAL FACES

- Same Candidates, Different Faces: Uncovering Media Bias in Visual Portrayals of Presidential Candidates with Computer Vision
- Looked at 13,026 images from 15 news websites about Clinton / Trump during 2016 election
- Looked at visual attribute differences (e.g., facial expressions, face size, skin condition) between the two candidates
- Used crowdsourced workers to rate a subset of 1,200 images and demonstrated that some visual features also effectively shape viewers' perceptions of media slant and impressions of the candidates
  - **We obtain similar results, but we *generate* faces**
- A big difference between this and our work is we consider images beyond known politicians (we also model these differences generatively)

Peng, Yilang. "Same Candidates, Different Faces: Uncovering Media Bias in Visual Portrayals of Presidential Candidates with Computer Vision." *Journal of Communication* 68.5 (2018): 920-941.



# RELATED WORK – PRIVILEGED INFORMATION

- Self-supervised learning of visual features through embedding images into text topic spaces
- Uses semantic representation in paired text domain to guide training
- Trains CNN to *predict* latent topics from text, then uses the features from the image model to perform classification
- Our dataset / problem is more challenging because of the **many-to-many** relationship with images to topics (image of White House can be paired with text about immigrants, Trump, Obama, military policy, etc.)
  - Thus, directly predicting text embeddings from image doesn't work as well

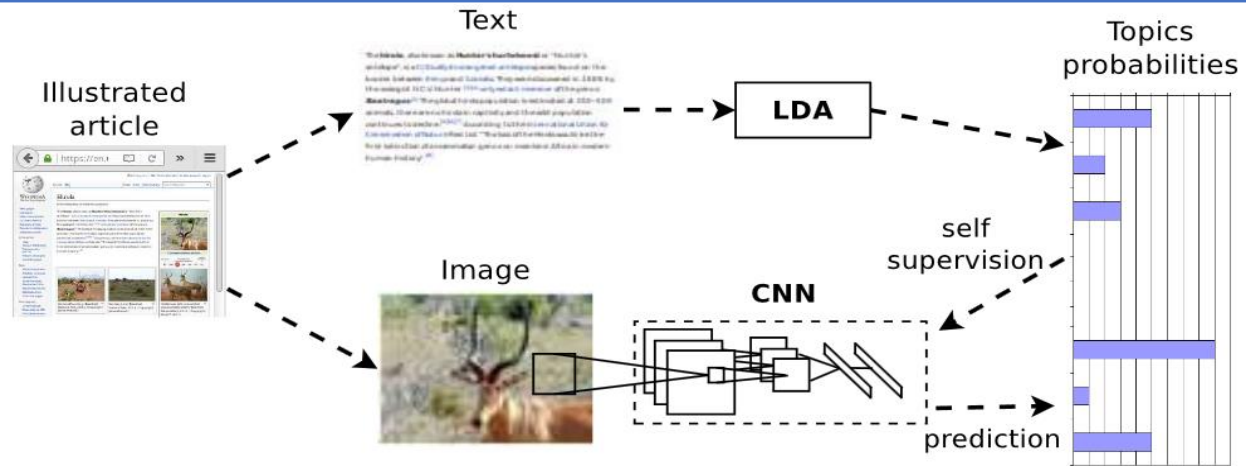



# OUTLINE

---

- Problem introduction
- Related research
- **Dataset**
- Our method
- Quantitative results
- Qualitative results

# DATASET COLLECTION

- Used an online resource of biased news sources (from left / right) and politically contentious issues
  - **20 issues:** Abortion, Black Lives Matter, LGBT, Welfare, etc.
- *Automatically* spidered these sites to find pages with images on them and associated text containing the query phrases
- Extracted **images** and **raw text articles** from the sources
  - Used Dragnet text extraction tool which automatically parses HTML for main article text
  - Process is *noisy*
- Around 1.8M images / articles total
- Dataset is *highly diverse* and also *noisy*

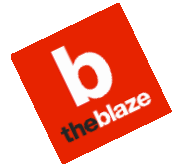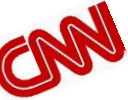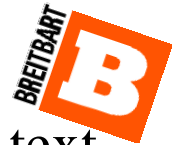

# DATA CLEANUP

- Many news sources report on the same visual content – thus many articles feature the same image
- We extract CNN features for every image in the dataset then we perform approximate KNN search using an off-the-shelf method
- This enables us to find near and exact matches of images
- To form our final dataset, find the side which is most common in the duplicate set and keep one of the instances
  - E.g. 5 times from left, 8 times from right, keep one of the instances from the right and discard all the other instances and their articles
- After cleanup  $>1M$  *unique* images and paired articles

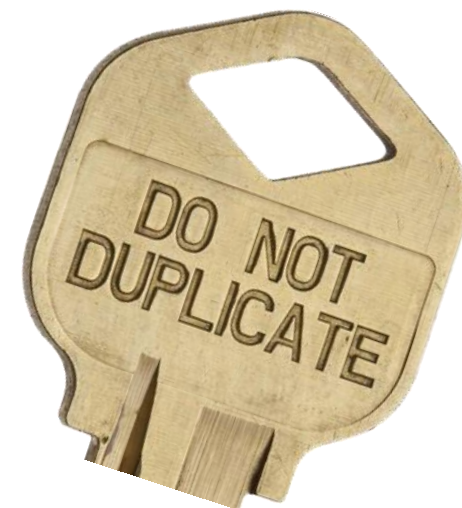

# DATASET DETAILS – BREAKDOWN BY POLITICS

Dataset Counts by Politics (after deduplication)

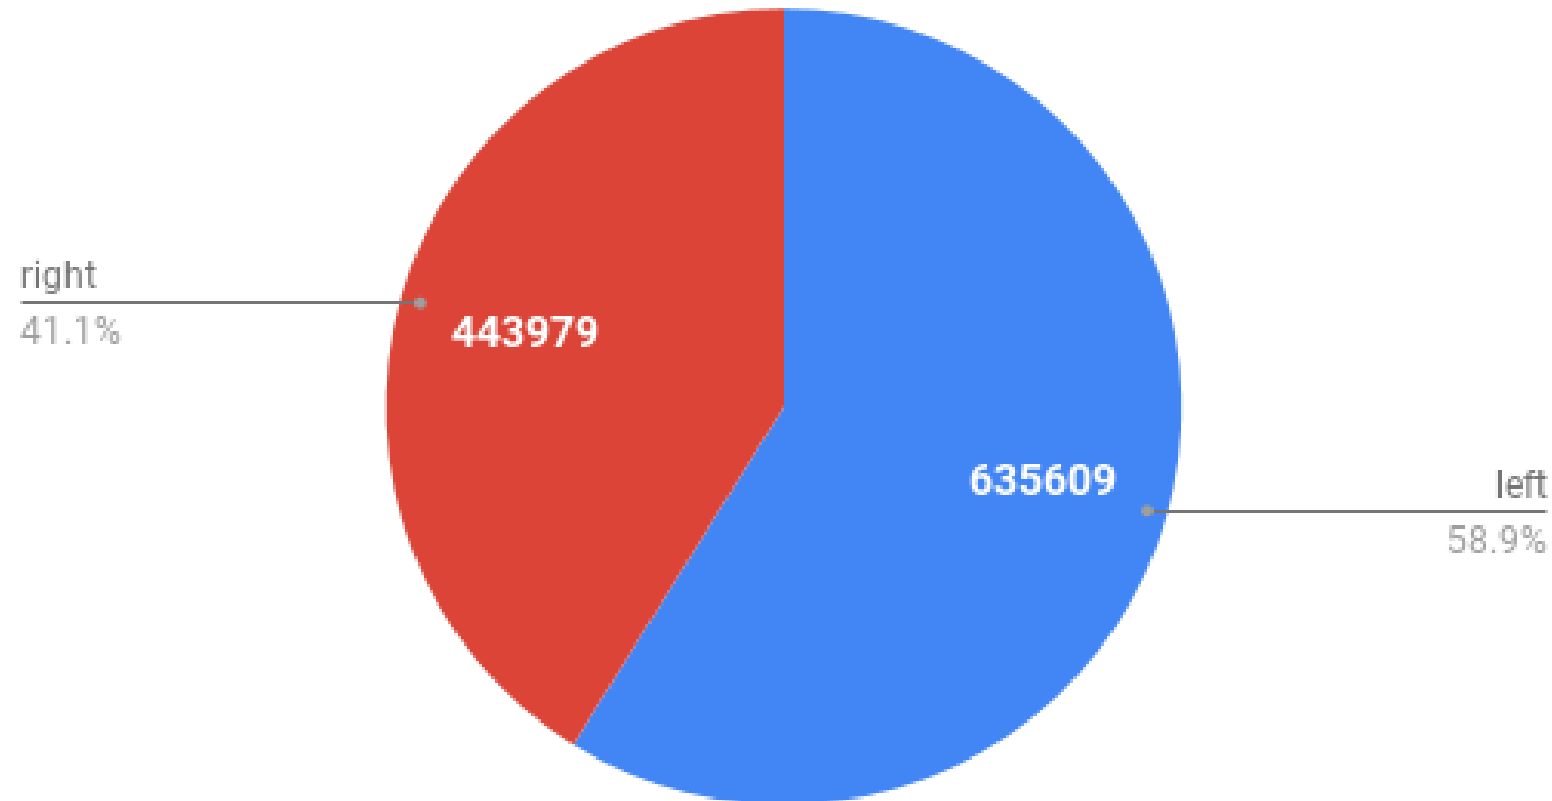

# DATASET DETAILS – BREAKDOWN BY ISSUE

Dataset Counts by Issue (after deduplication)

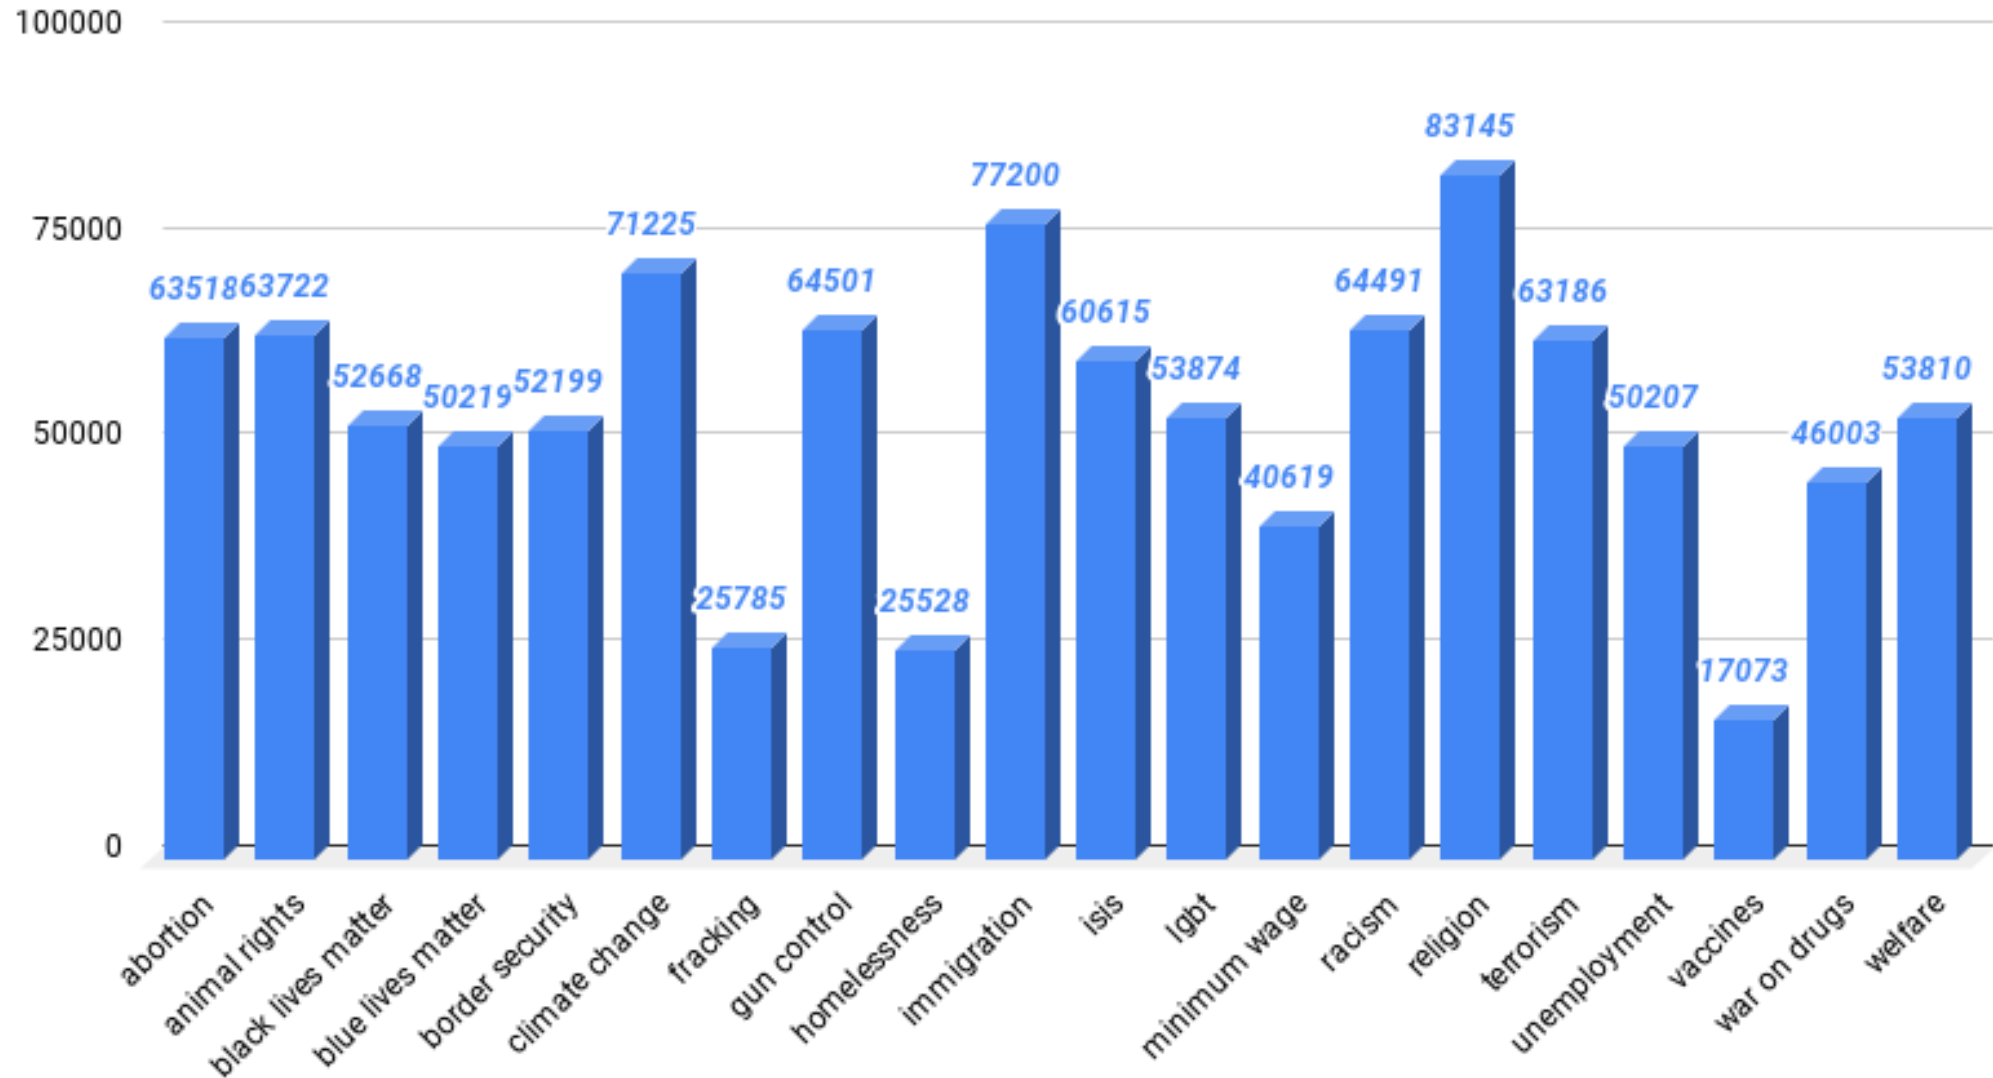

# DATASET CHALLENGES

- Noise in dataset comes from **automatic harvesting**
  - We assume that any images harvested from a left/right site are of that political label, but they actually may be unbiased or have the reverse bias
- Challenges include:
  - Images may be unrelated to query (i.e. unrelated content on page, ads, etc.)
  - Text may fail to parse correctly or contain headers or other noise
  - Lots of noisy images – text, crops of web pages, clipart illustrations, etc.
  - Images that just aren't politically biased

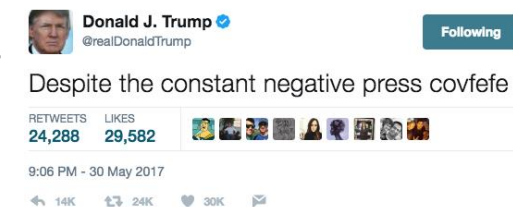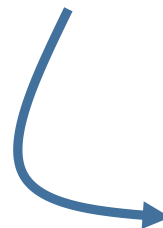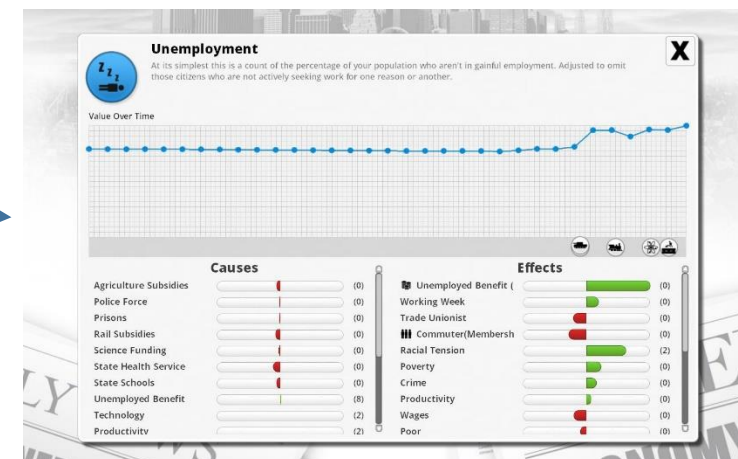

# CROWDSOURCING

- We ran a large-scale crowdsourcing study on Mturk asking workers to guess the political leaning of images
- We showed 3,237 images to at least three workers each
- 993 images were labeled clearly L/R by at least a majority
- We also asked what **image features** workers used to guess
  - E.g. closeup of face, portrays a public figure, a group or class of people is portrayed in a political way, contained symbols (e.g. swastika), etc.
- We also showed workers the article and asked questions about the *pair*
  - What article text is best aligned with the image
  - Topic of the image and article
  - Finally we asked workers to explain their predictions for a small number
- We manually went through the responses and mined concepts used by humans
  - **Recognized people** and used their knowledge + image's portrayal
  - Used **stereotypical concepts** to guess (e.g. African American = Left)
- Queried Google Images for these concepts and trained an image classifier to detect Mturk stereotypical concepts (used as Human Concepts baseline)



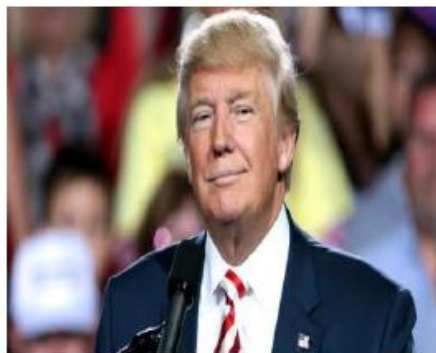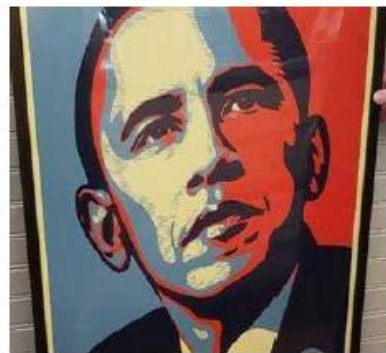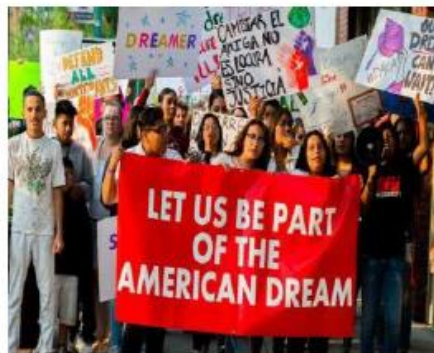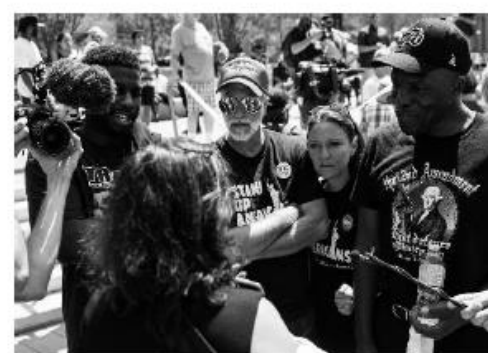

|                                       |                                                                   |                                                               |                                                                  |
|---------------------------------------|-------------------------------------------------------------------|---------------------------------------------------------------|------------------------------------------------------------------|
| Republican president<br>Guess: R      | A heroic memeified photo of Obama comes form liberals<br>Guess: L | Liberal stance: Anti-discrimination for Hispanics<br>Guess: L | This picture is showing trump supporters at a rally.<br>Guess: R |
| positive picture of Trump<br>Guess: R | A positive picture of Obama<br>Guess: L                           | Supporting a liberal policy<br>Guess: L                       | Gun rights supporter are generally right leaning.<br>Guess: R    |
| trump smiling<br>Guess: R             | PIC OF OBAMA, LIBERAL PRESIDENT<br>Guess: L                       | Pro immigration<br>Guess: L                                   | Second Amendment shirt would lean right.<br>Guess: R             |

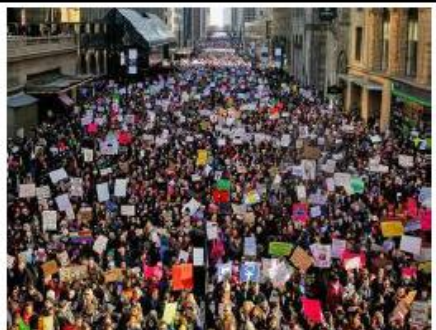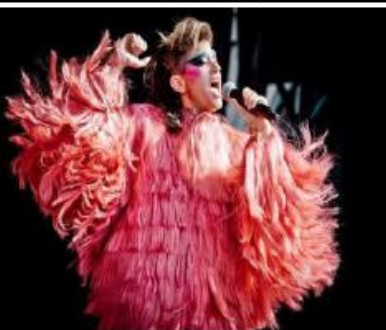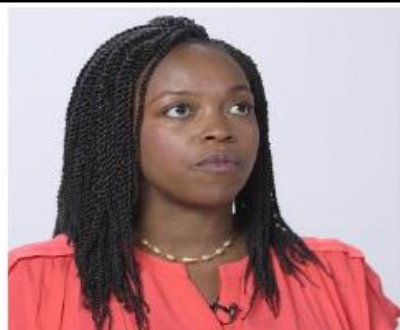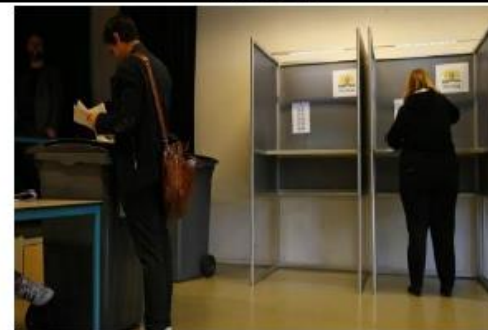

|                                                  |                                                                                              |                                                                 |                                                                                                              |
|--------------------------------------------------|----------------------------------------------------------------------------------------------|-----------------------------------------------------------------|--------------------------------------------------------------------------------------------------------------|
| THE LEFT LOVES TO PROTEST.<br>Guess: L           | Looks like a man cross dressing so that would only be supported by a left winger<br>Guess: L | many black women are more liberal than conservative<br>Guess: L | the image involves voters and the Republicans are very concerned about the threat of voter fraud<br>Guess: R |
| they like protesting a lot<br>Guess: L           | Weirdness embraced<br>Guess: L                                                               | Most african american women lean left<br>Guess: L               | i chose right because it looks like a voting booth<br>Guess: R                                               |
| Looks like a leftist political rally<br>Guess: L | Looks like a gay person<br>Guess: L                                                          | <b>Guessed incorrectly</b>                                      | <b>Guessed incorrectly</b>                                                                                   |



# CROWDSOURCING CONSENSUS VS NO CONSENSUS

## Unanimous

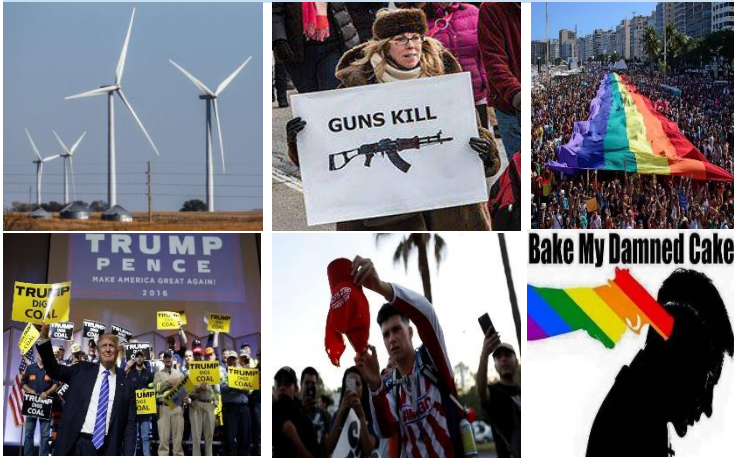

## Majority Agree

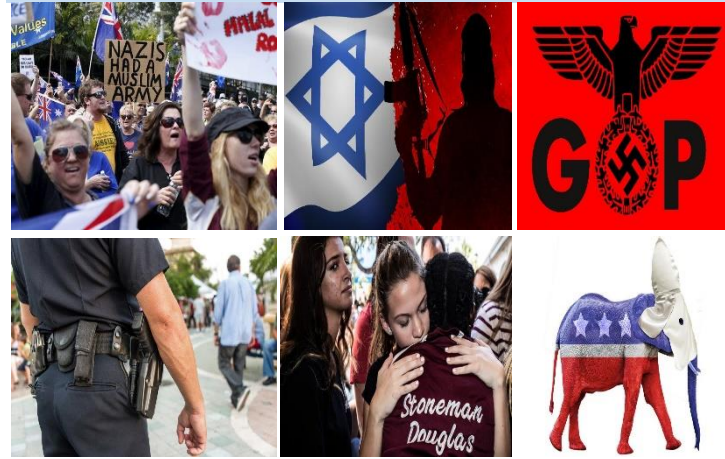

## No Consensus

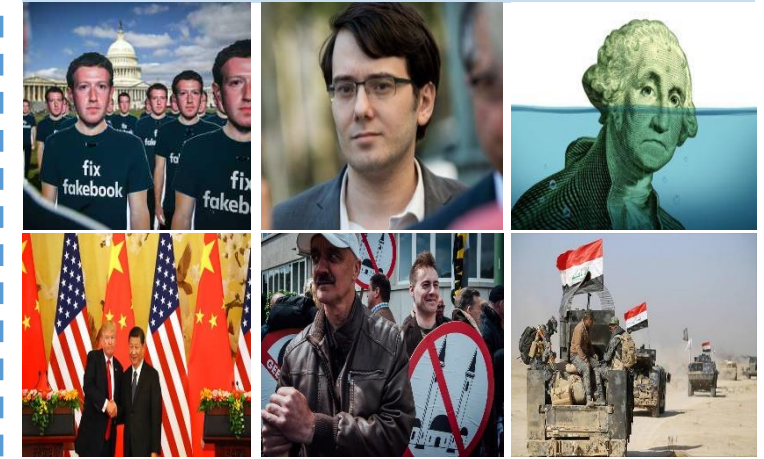

Examples of images where all workers agree, the majority agree, and for which there was no consensus on the left / right leaning

# OUTLINE

---

- Problem introduction
- Related research
- Dataset
- **Our method**
- Quantitative results
- Qualitative results

# MODEL ARCHITECTURE

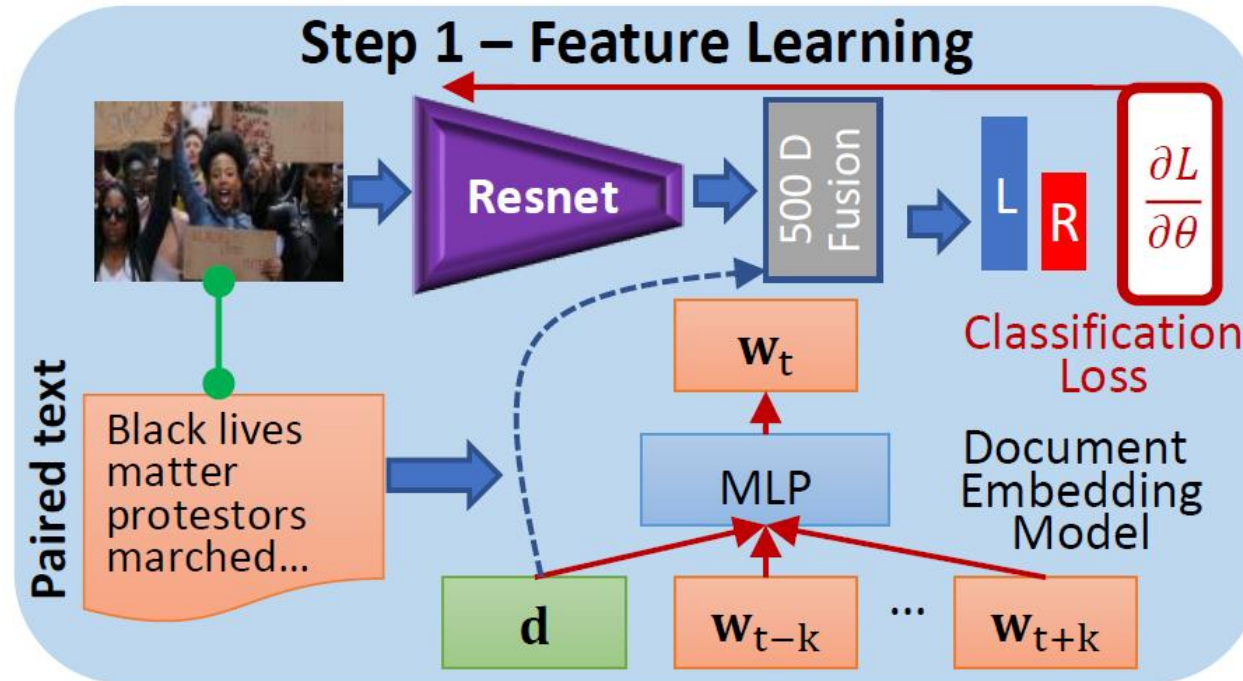

- Document embeddings from paired article text act as a source of **privileged information** to help guide training
- Article text is **not** used at test time

- We propose a two-stage approach
- In the first stage, we learn a **document embedding** model from the paired articles
- We then train a Resnet which takes in an image and the document embedding and predicts whether the image-text pair is left/right

# MODEL ARCHITECTURE

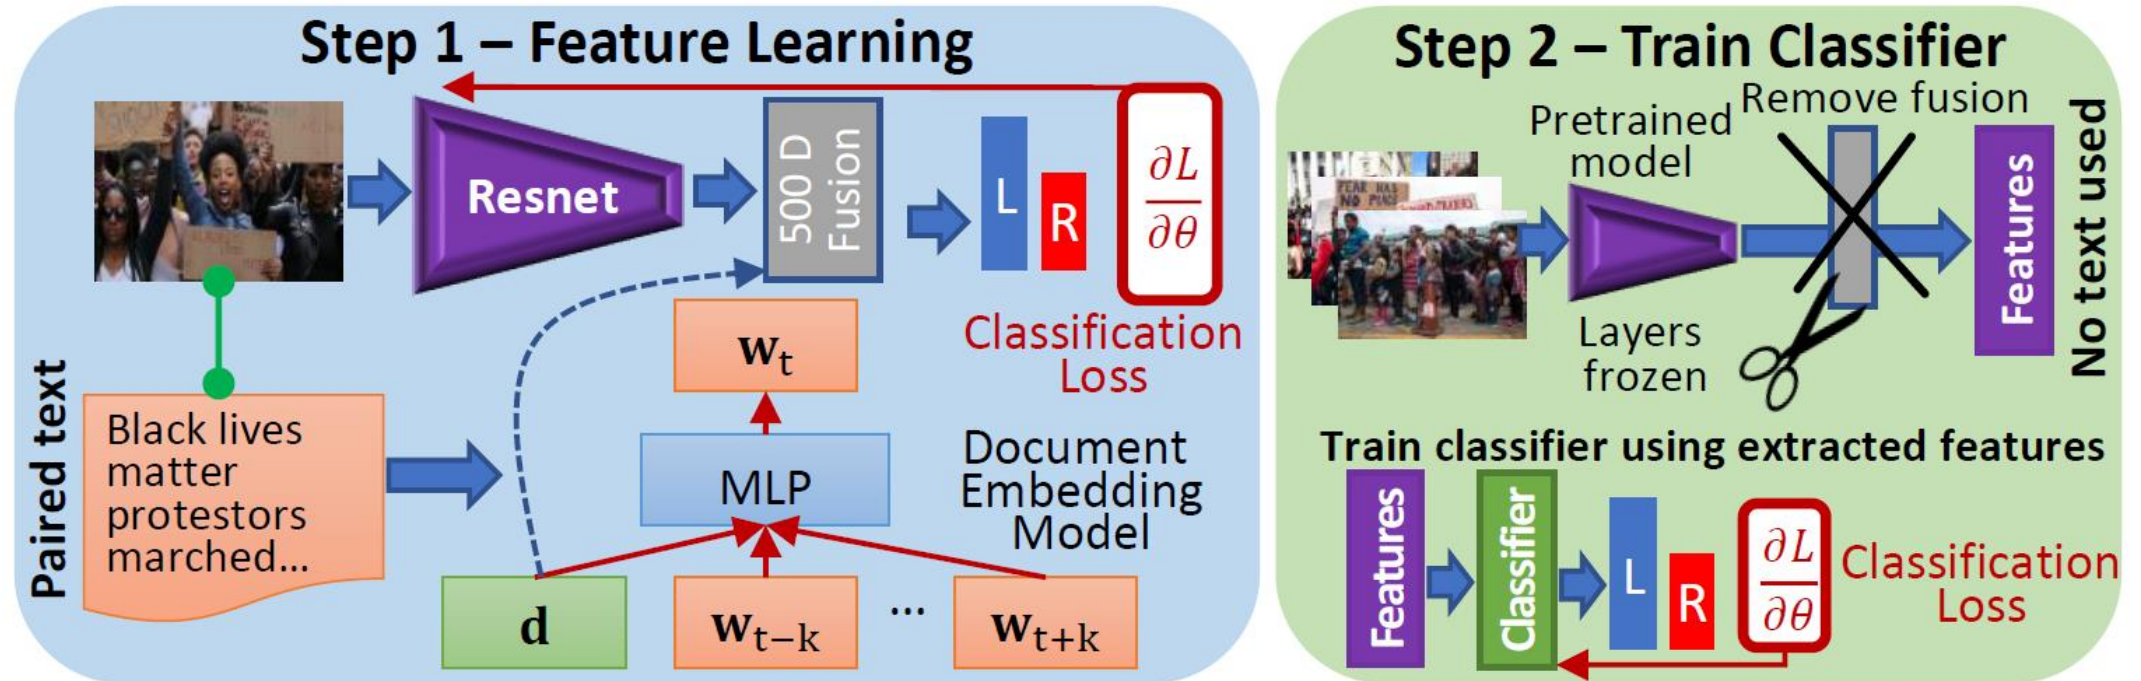

- In stage two, we **remove the model's dependency on text**
- We remove the multi-modal fusion layer and train a classifier using the features from the CNN trained in stage 1, while freezing the CNN layers
- Our model thus uses **no text at test time**

# OUTLINE

---

- Problem introduction
- Related research
- Dataset
- Our method
- **Quantitative results**
- Qualitative results



# EXPERIMENTAL RESULTS – WEAKLY SUPERVISED

| Method   | RESNET | JOO   | HUMAN CONCEPTS | OCR   | OURS         | OURS (GT) |
|----------|--------|-------|----------------|-------|--------------|-----------|
| Accuracy | 0.678  | 0.670 | 0.675          | 0.686 | <b>0.712</b> | 0.803     |

- Accuracy of predicting Left / Right labels on weakly supervised test set
  - Weakly supervised labels are left / right label of the media source the image came from
- Baselines:
  - **Resnet** – An off-the-shelf 50 layer residual network
  - **Joo et al.** – Uses features presented by Joo et al. for predicting visual persuasion + resnet
  - **Human Concepts** – Features of model trained to predict concepts that MTurkers used
  - **OCR** – Resnet + Optical Character Recognition (uses trained word embeddings of detected words)
- ***Ours (GT) uses text at test time and is thus not purely a visual prediction***
- **Using text domain to guide training of purely visual model improves performance**



# EXPERIMENTAL RESULTS – HUMAN LABELS

| Feature/Method   | RESNET | JOO          | HUMAN CONCEPTS | OCR          | OURS         | OURS (GT) |
|------------------|--------|--------------|----------------|--------------|--------------|-----------|
| Closeup          | 0.567  | 0.544        | 0.622          | 0.578        | <b>0.656</b> | 0.578     |
| Known Person     | 0.567  | 0.550        | <b>0.570</b>   | 0.560        | 0.521        | 0.575     |
| Multiple People  | 0.722  | 0.671        | 0.688          | 0.730        | <b>0.768</b> | 0.705     |
| No People        | 0.556  | <b>0.605</b> | 0.494          | 0.580        | 0.593        | 0.667     |
| Symbols          | 0.558  | 0.596        | 0.548          | 0.577        | <b>0.606</b> | 0.587     |
| Non-Photographic | 0.577  | 0.569        | 0.584          | 0.577        | <b>0.585</b> | 0.654     |
| Logos            | 0.545  | 0.584        | 0.597          | <b>0.662</b> | 0.623        | 0.584     |
| Text in Image    | 0.629  | 0.625        | 0.596          | <b>0.637</b> | 0.607        | 0.659     |
| Average          | 0.590  | 0.593        | 0.587          | 0.613        | <b>0.620</b> | 0.626     |

- We also eval. on human labeled data
  - Images that at least a majority of annotators agreed upon

# EXPERIMENTAL RESULTS – HUMAN LABELS

| Feature/Method   | RESNET | JOO          | HUMAN CONCEPTS | OCR          | OURS         | OURS (GT) |
|------------------|--------|--------------|----------------|--------------|--------------|-----------|
| Closeup          | 0.567  | 0.544        | 0.622          | 0.578        | <b>0.656</b> | 0.578     |
| Known Person     | 0.567  | 0.550        | <b>0.570</b>   | 0.560        | 0.521        | 0.575     |
| Multiple People  | 0.722  | 0.671        | 0.688          | 0.730        | <b>0.768</b> | 0.705     |
| No People        | 0.556  | <b>0.605</b> | 0.494          | 0.580        | 0.593        | 0.667     |
| Symbols          | 0.558  | 0.596        | 0.548          | 0.577        | <b>0.606</b> | 0.587     |
| Non-Photographic | 0.577  | 0.569        | 0.584          | 0.577        | <b>0.585</b> | 0.654     |
| Logos            | 0.545  | 0.584        | 0.597          | <b>0.662</b> | 0.623        | 0.584     |
| Text in Image    | 0.629  | 0.625        | 0.596          | <b>0.637</b> | 0.607        | 0.659     |
| Average          | 0.590  | 0.593        | 0.587          | 0.613        | <b>0.620</b> | 0.626     |

- Results are sensible
- Human Concepts – Works best on celebrities, politicians, etc.

# EXPERIMENTAL RESULTS – HUMAN LABELS

| Feature/Method   | RESNET | JOO          | HUMAN CONCEPTS | OCR          | OURS         | OURS (GT) |
|------------------|--------|--------------|----------------|--------------|--------------|-----------|
| Closeup          | 0.567  | 0.544        | 0.622          | 0.578        | <b>0.656</b> | 0.578     |
| Known Person     | 0.567  | 0.550        | <b>0.570</b>   | 0.560        | 0.521        | 0.575     |
| Multiple People  | 0.722  | 0.671        | 0.688          | 0.730        | <b>0.768</b> | 0.705     |
| No People        | 0.556  | <b>0.605</b> | 0.494          | 0.580        | 0.593        | 0.667     |
| Symbols          | 0.558  | 0.596        | 0.548          | 0.577        | <b>0.606</b> | 0.587     |
| Non-Photographic | 0.577  | 0.569        | 0.584          | 0.577        | <b>0.585</b> | 0.654     |
| Logos            | 0.545  | 0.584        | 0.597          | <b>0.662</b> | 0.623        | 0.584     |
| Text in Image    | 0.629  | 0.625        | 0.596          | <b>0.637</b> | 0.607        | 0.659     |
| Average          | 0.590  | 0.593        | 0.587          | 0.613        | <b>0.620</b> | 0.626     |

- Results are sensible
- OCR – Works best on images containing text in the image

# EXPERIMENTAL RESULTS – HUMAN LABELS

| Feature/Method   | RESNET | JOO          | HUMAN CONCEPTS | OCR          | OURS         | OURS (GT) |
|------------------|--------|--------------|----------------|--------------|--------------|-----------|
| Closeup          | 0.567  | 0.544        | 0.622          | 0.578        | <b>0.656</b> | 0.578     |
| Known Person     | 0.567  | 0.550        | <b>0.570</b>   | 0.560        | 0.521        | 0.575     |
| Multiple People  | 0.722  | 0.671        | 0.688          | 0.730        | <b>0.768</b> | 0.705     |
| No People        | 0.556  | <b>0.605</b> | 0.494          | 0.580        | 0.593        | 0.667     |
| Symbols          | 0.558  | 0.596        | 0.548          | 0.577        | <b>0.606</b> | 0.587     |
| Non-Photographic | 0.577  | 0.569        | 0.584          | 0.577        | <b>0.585</b> | 0.654     |
| Logos            | 0.545  | 0.584        | 0.597          | <b>0.662</b> | 0.623        | 0.584     |
| Text in Image    | 0.629  | 0.625        | 0.596          | <b>0.637</b> | 0.607        | 0.659     |
| Average          | 0.590  | 0.593        | 0.587          | 0.613        | <b>0.620</b> | 0.626     |

- Results are sensible
- Ours – Works best on more categories than others and works best overall

# OUTLINE

---

- Problem introduction
- Related research
- Dataset
- Our method
- Quantitative results
- **Qualitative results**



# QUALITATIVE RESULTS

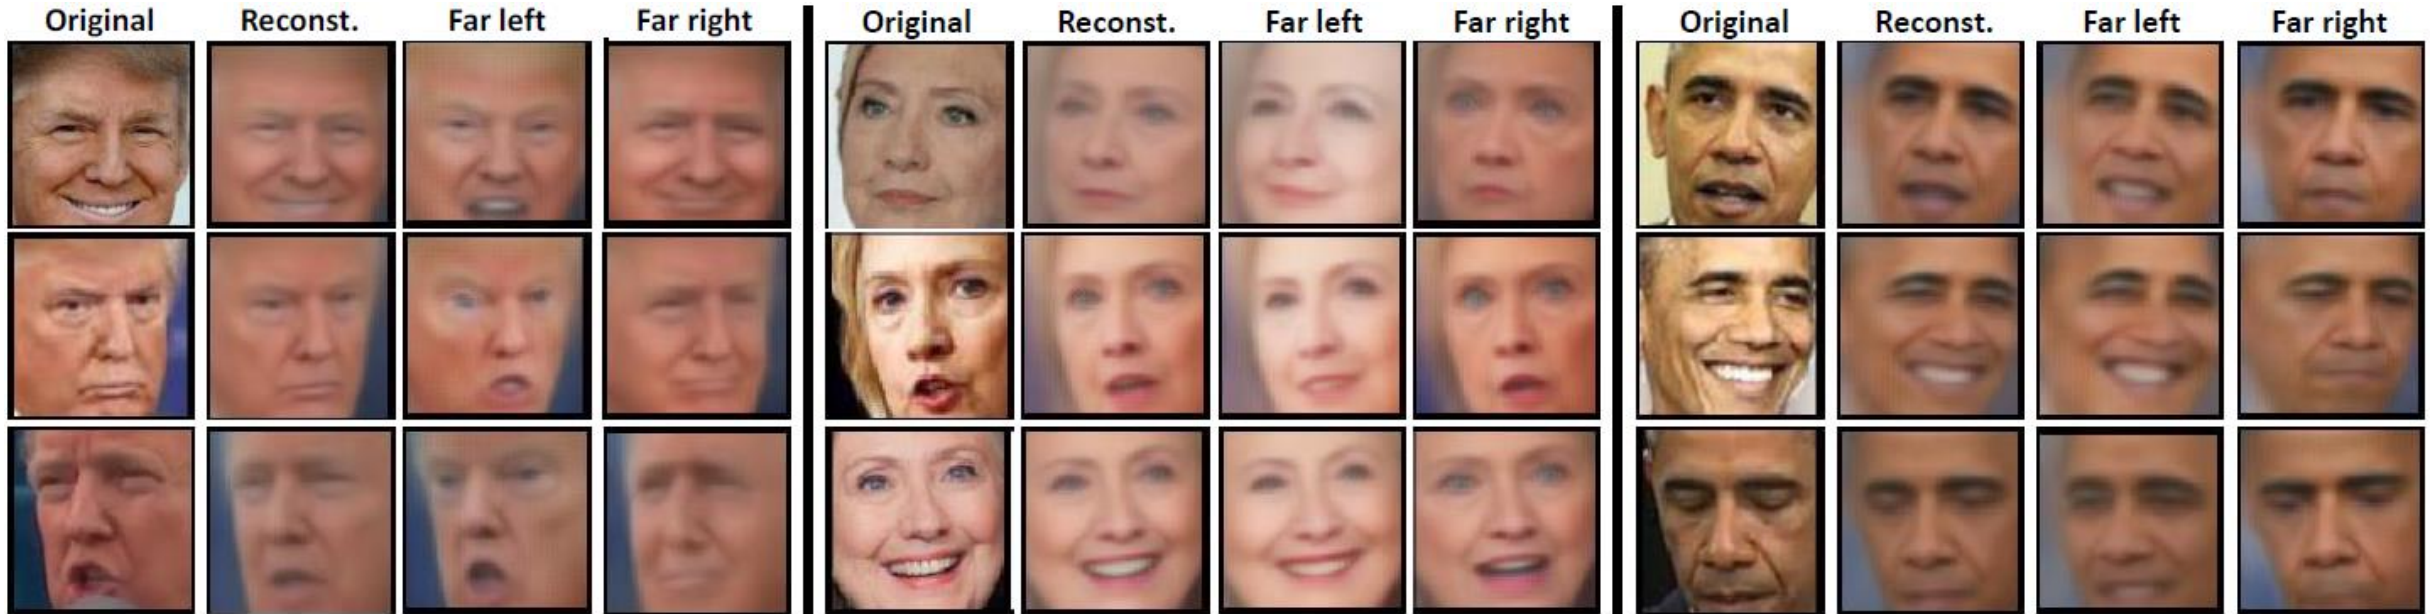

- Trained generative autoencoder on known politicians faces, conditioned on facial semantic attributes / expressions, as well as latent face embedding from autoencoder
- Modify images to be more Left / Right leaning (move embedding towards avg. L/R embedding)
- Trump – Happier on right, angrier/meaner Left
- Hillary – Younger, brighter skin on left, yelling, older on right

# QUALITATIVE RESULTS

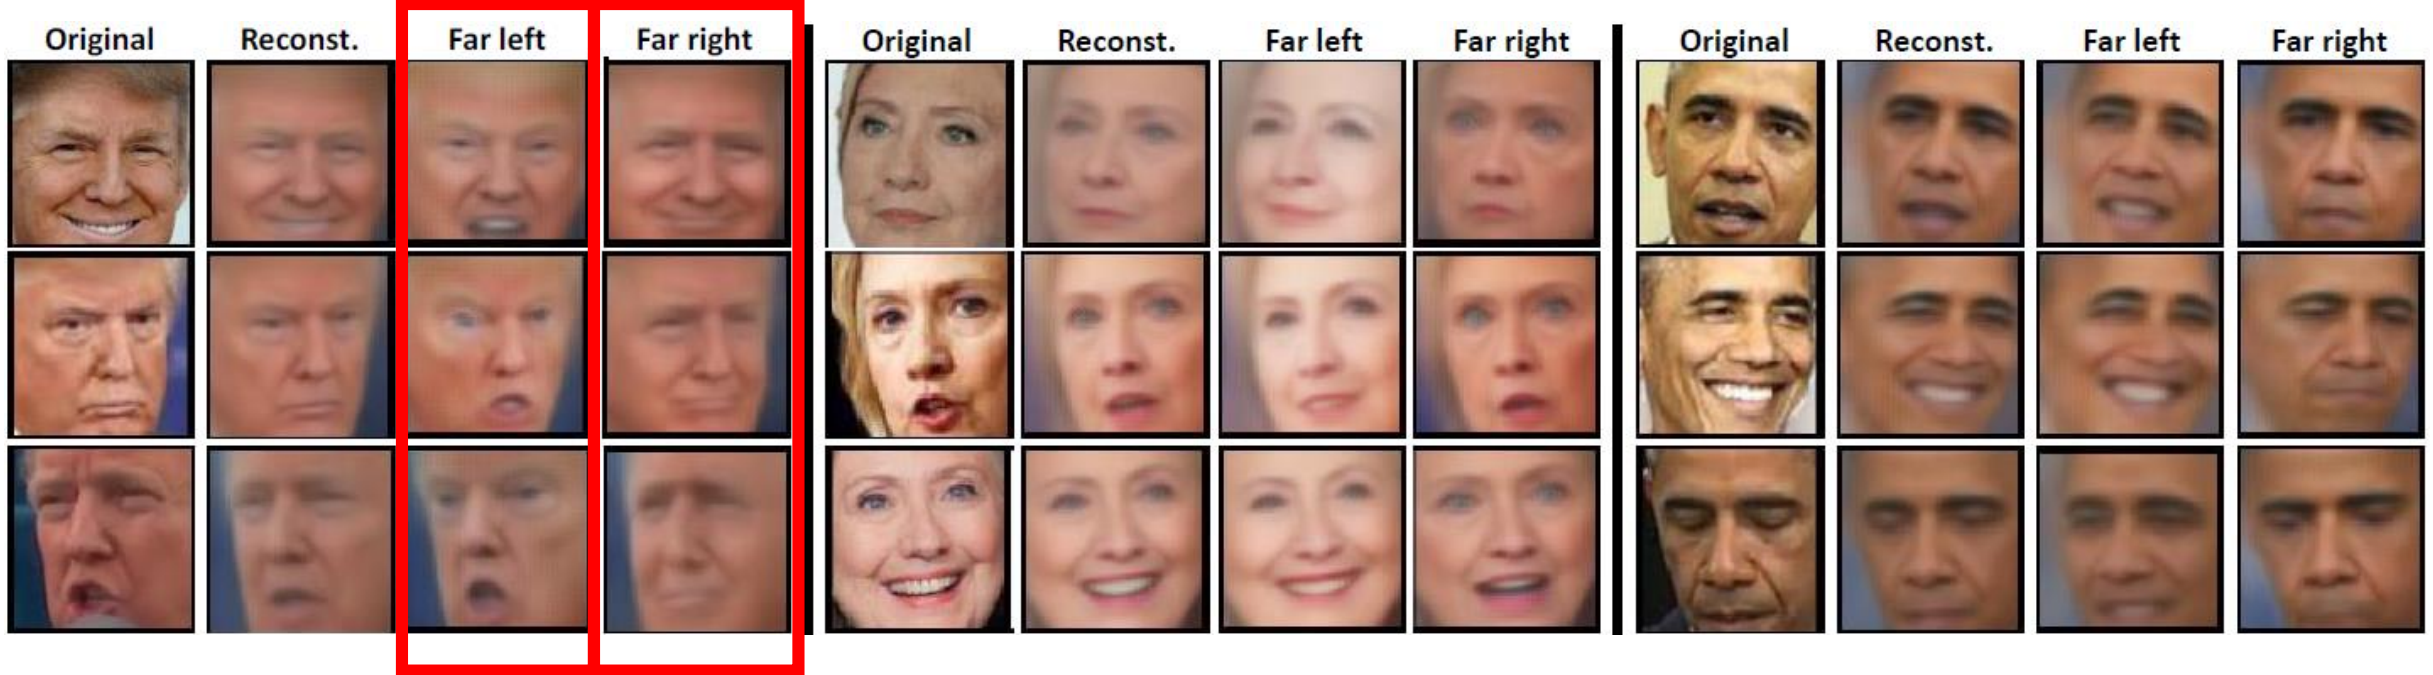

- Trained generative autoencoder on known politicians faces, conditioned on facial semantic attributes / expressions, as well as latent face embedding from autoencoder
- Modify images to be more Left / Right leaning (move embedding towards avg. L/R embedding)
- Trump – Happier on right, angrier/meaner Left
- Hillary – Younger, brighter skin on left, yelling, older on right



# QUALITATIVE RESULTS

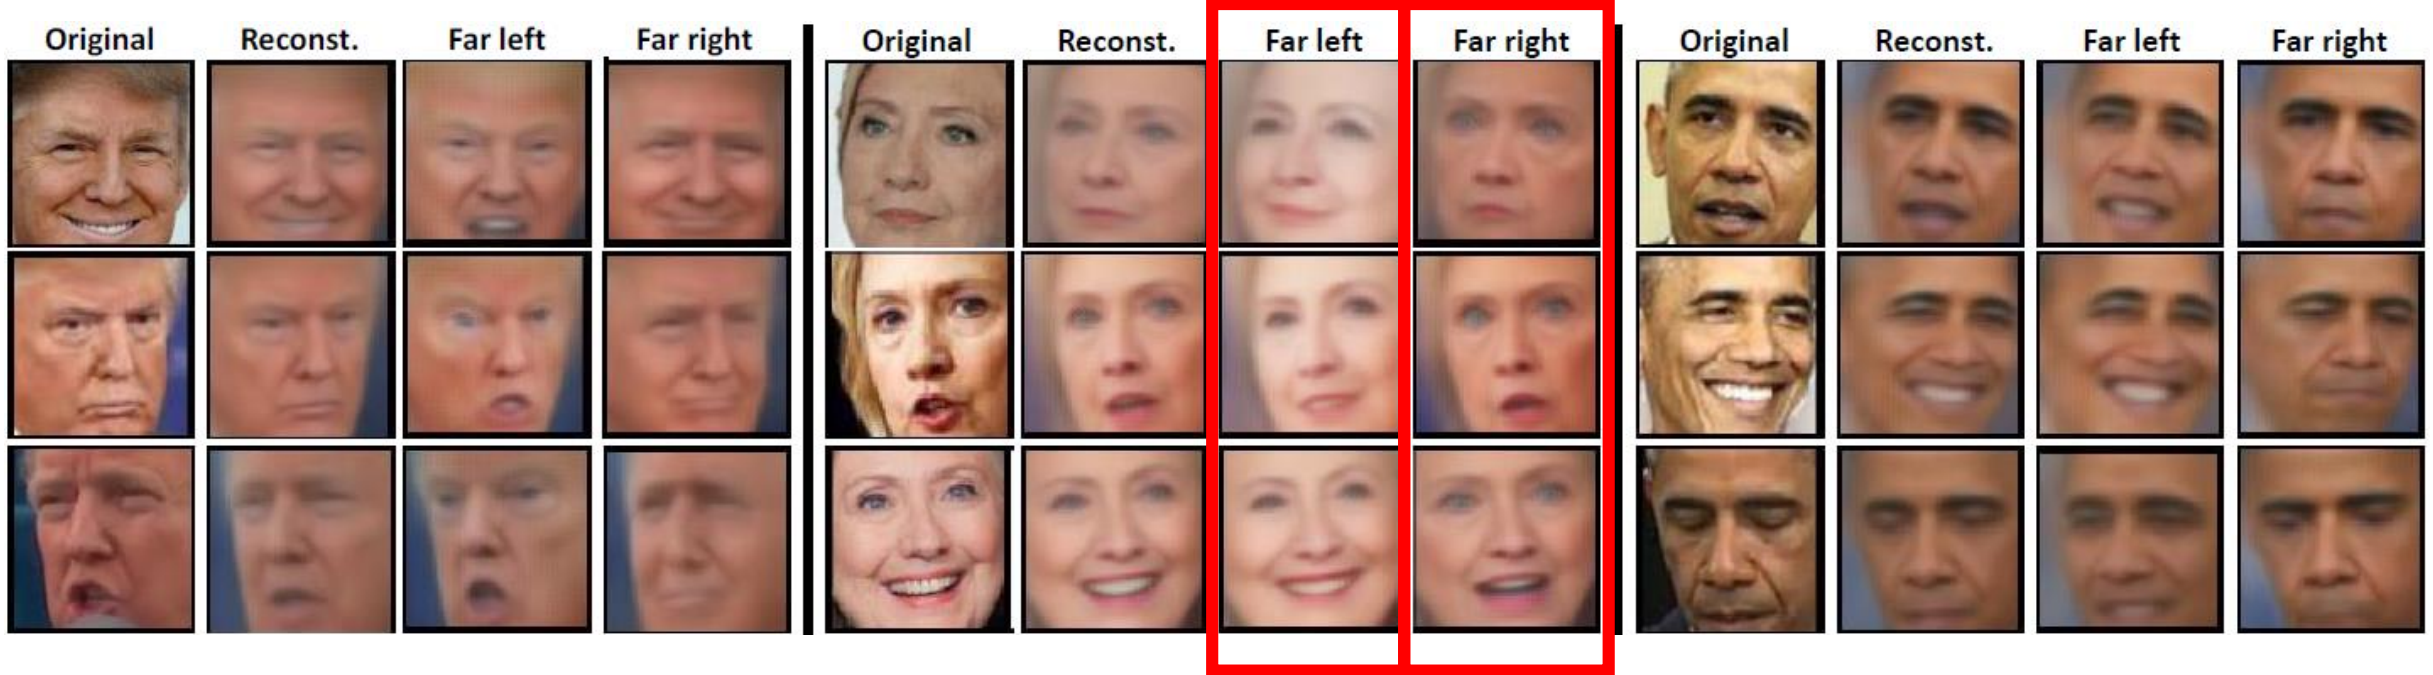

- Trained generative autoencoder on known politicians faces, conditioned on facial semantic attributes / expressions, as well as latent face embedding from autoencoder
- Modify images to be more Left / Right leaning (move embedding towards avg. L/R embedding)
- Trump – Happier on right, angrier/meaner Left
- Hillary – Younger, brighter skin on left, yelling, older on right

# QUALITATIVE RESULTS

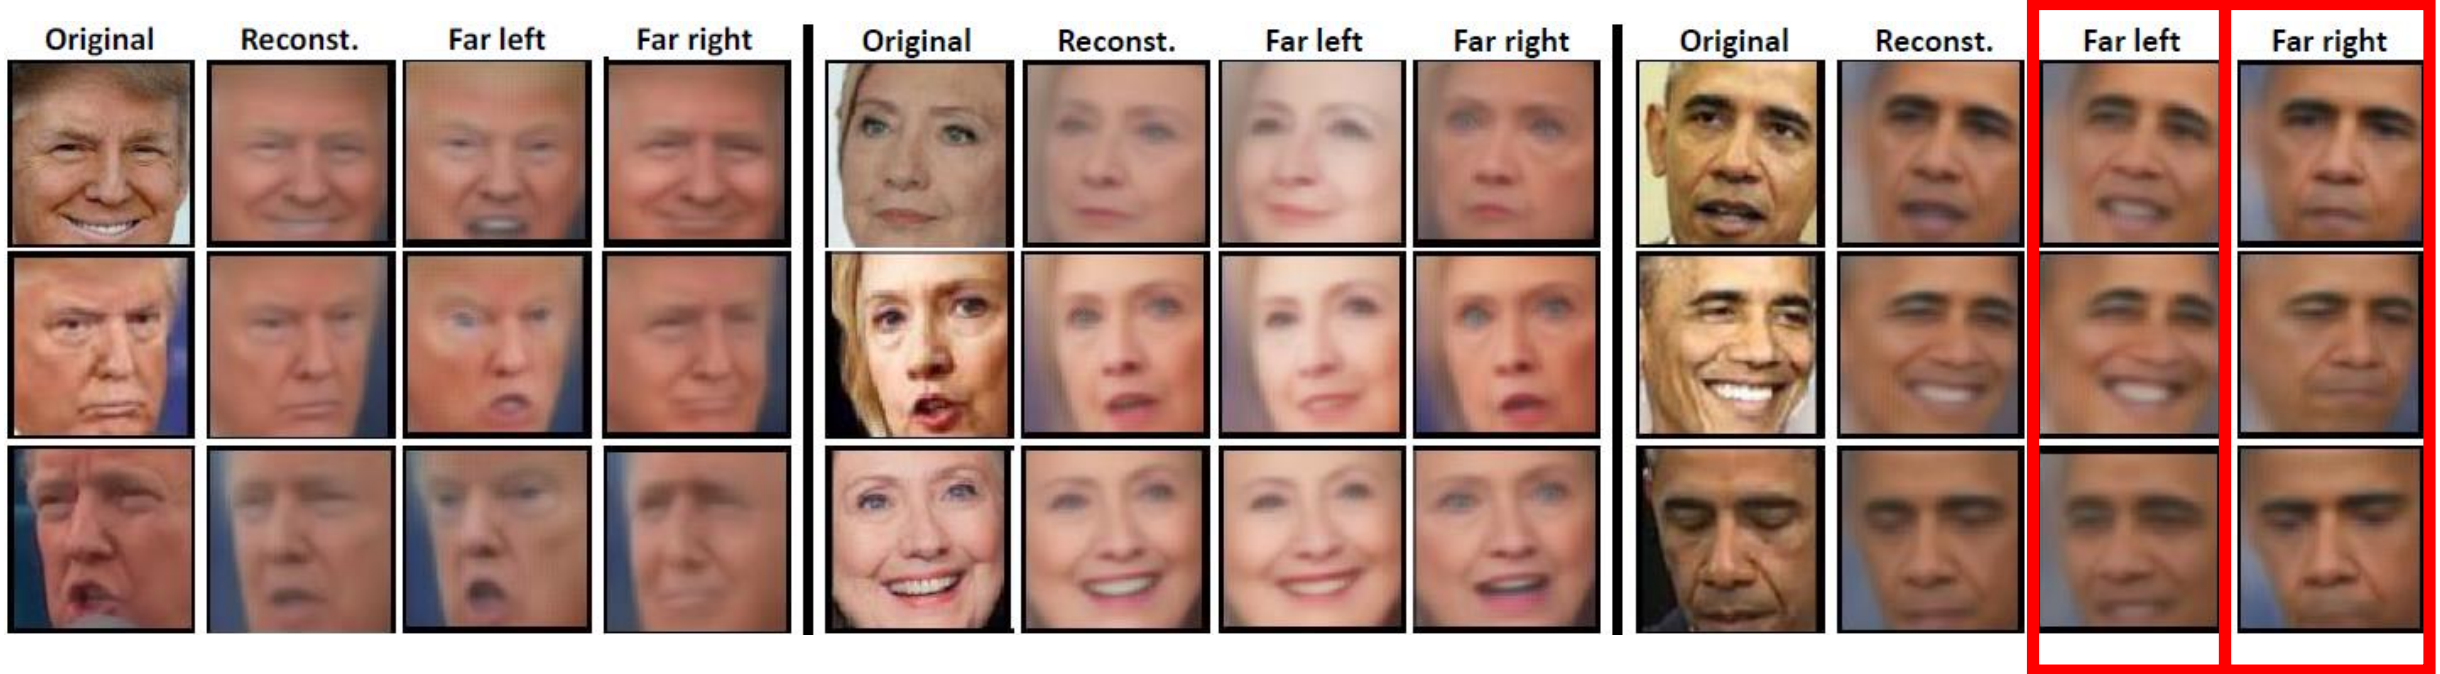

- Trained generative autoencoder on known politicians faces, conditioned on facial semantic attributes / expressions, as well as latent face embedding from autoencoder
- Modify images to be more Left / Right leaning (move embedding towards avg. L/R embedding)
- Trump – Happier on right, angrier/meaner Left
- Hillary – Younger, brighter skin on left, yelling, older on right



# CLOSEST IMAGES ACROSS L/R BY TOPICS

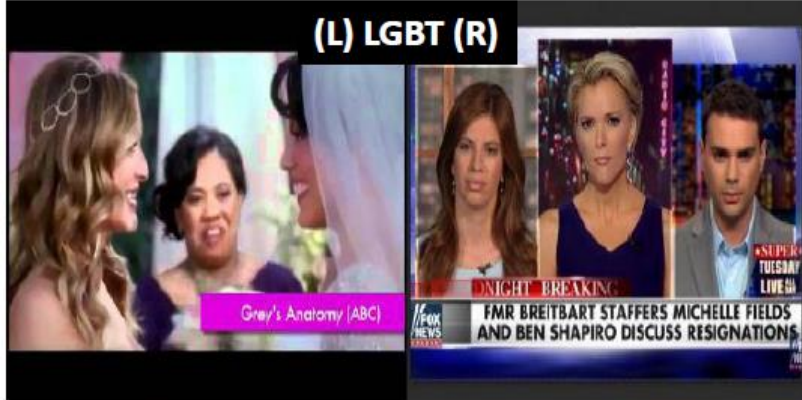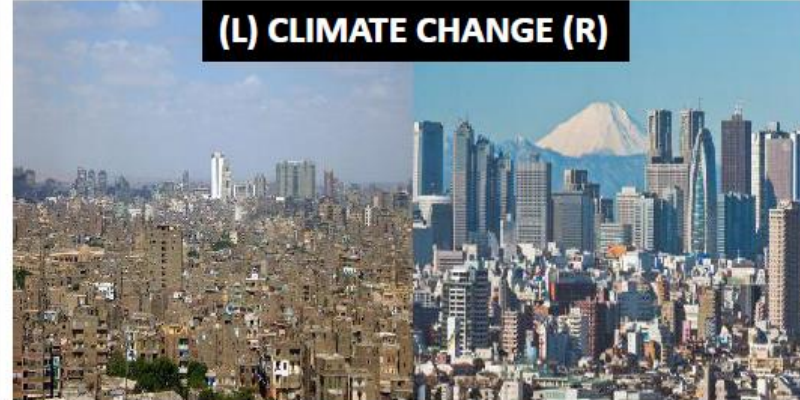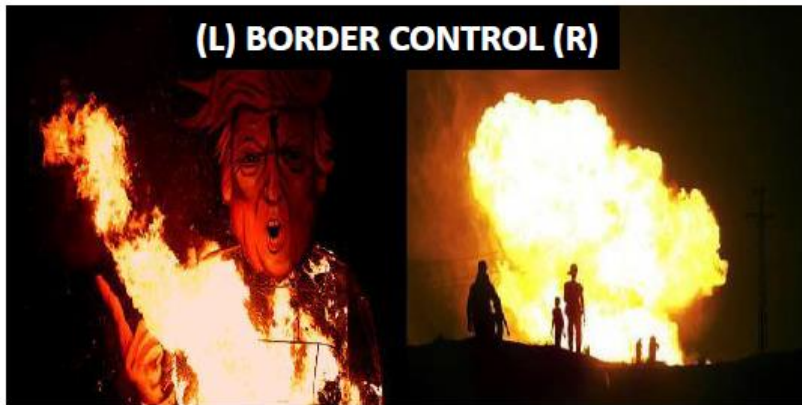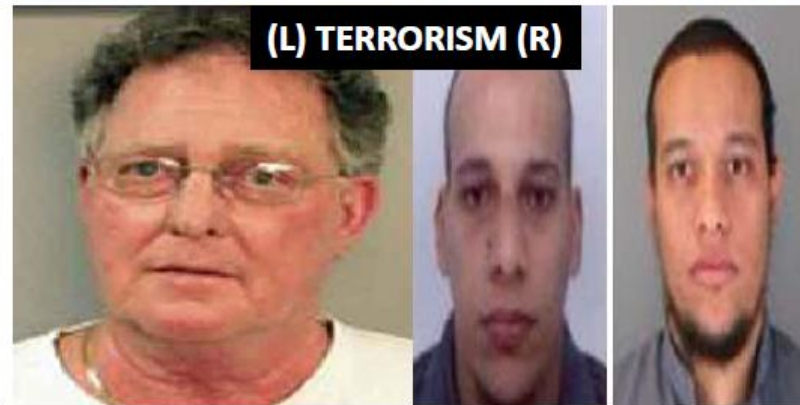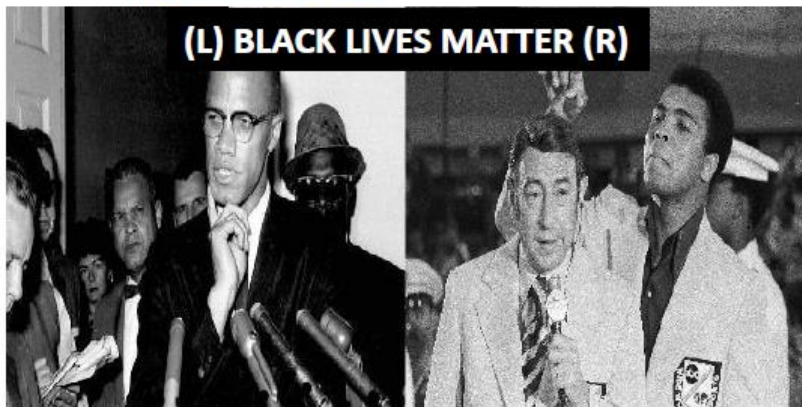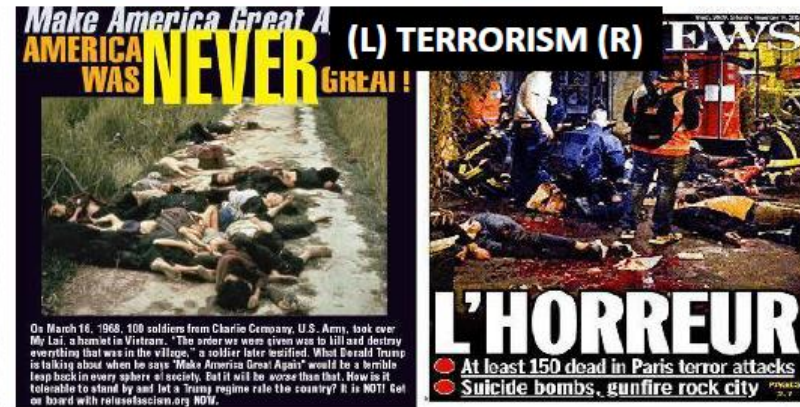

- We show closest pair of images across the left/right divide
- Note how similar the images in each pair are on the surface, illustrating the challenge of visual bias prediction



# WHAT'S IN THE LATENT TEXT SPACE [DOC2VEC]

Query:

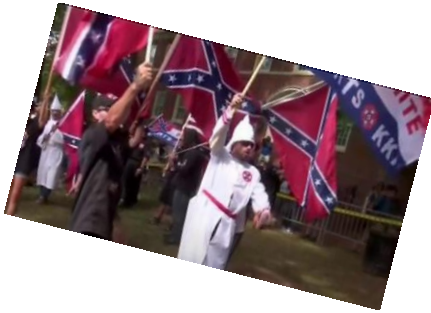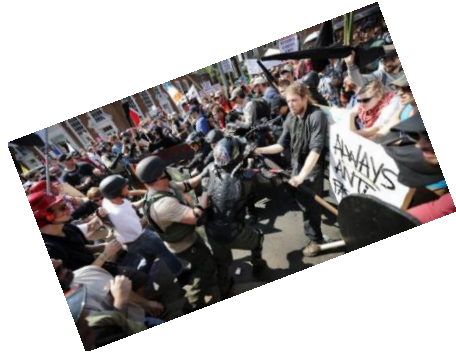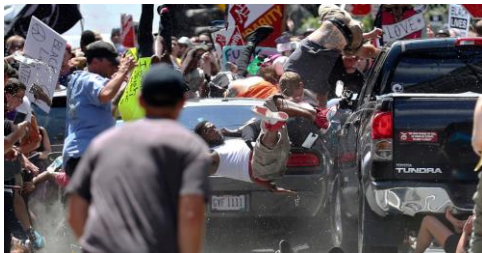

charlottesville

charleston: 0.7303

parkland: 0.7189

antifa: 0.7135

kkk: 0.7117

ferguson: 0.7038

dallas: 0.6998

confederate: 0.6995

richmond: 0.6956

shooting: 0.6879

horrific: 0.6844

portland: 0.6828

riots: 0.6826

cleveland: 0.6817

heyer: 0.6806

protest: 0.6782

rally: 0.6779

R  
e  
s  
u  
l  
t  
s

parkland

newtown: 0.7640

hogg: 0.7635

stoneman: 0.7501

nra: 0.7455

charlottesville: 0.7189

shooting: 0.7161

walkout: 0.7135

walkouts: 0.7029

charleston: 0.7002

tragedy: 0.6991

orlando: 0.6986

emma4change: 0.6931

msd: 0.6844

sandyhook: 0.6841

shootings: 0.6795

gun: 0.6752

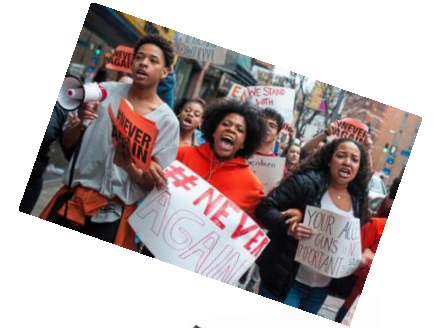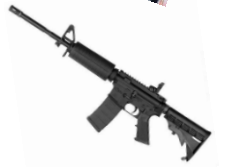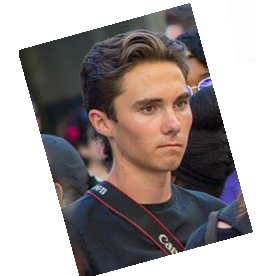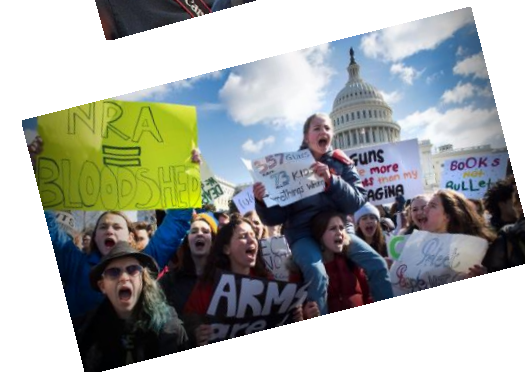

# PREDICTING WORDS FROM IMAGES

Antifa

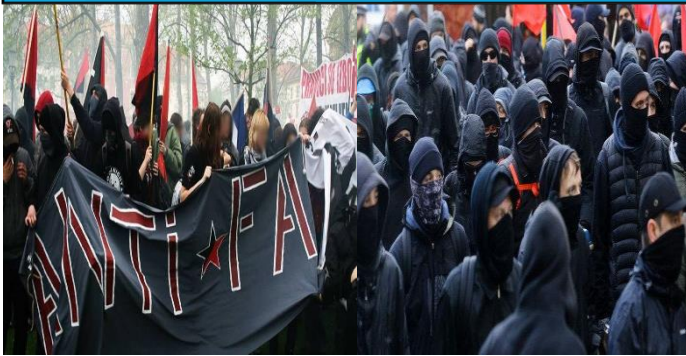

Brutality

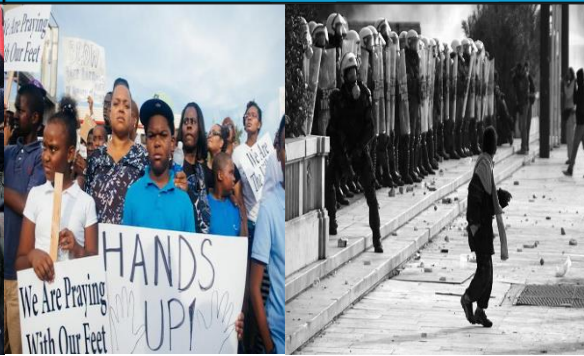

Immigrant

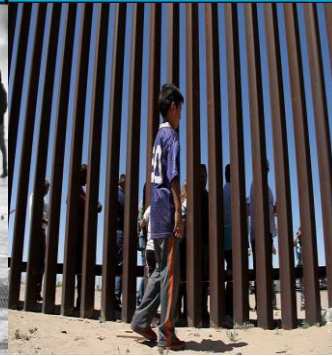

LGBT

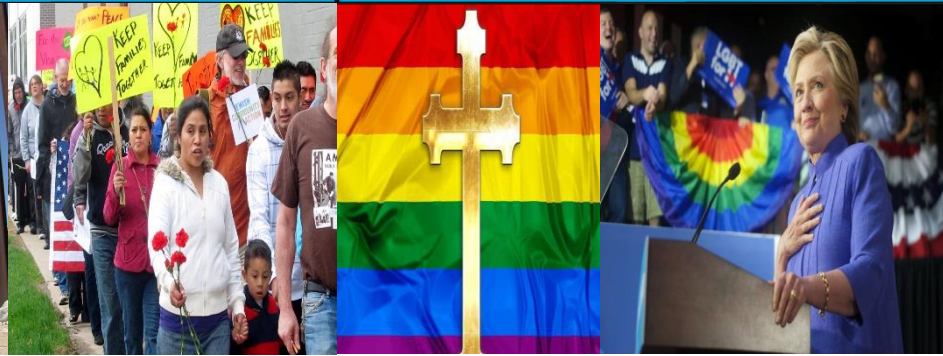

- Train a model to **predict individual words from images** given the image and the document embedding
- The model learns **visual cues for each word**, demonstrating the utility of exploiting text, even for purely visual classification
- Black clad protestors → “antifa”, Protestors, police → “Brutality”, Border wall / Hispanics → “Immigrant”, Pride flags → “LGBT”



# VISUAL EXPLANATIONS

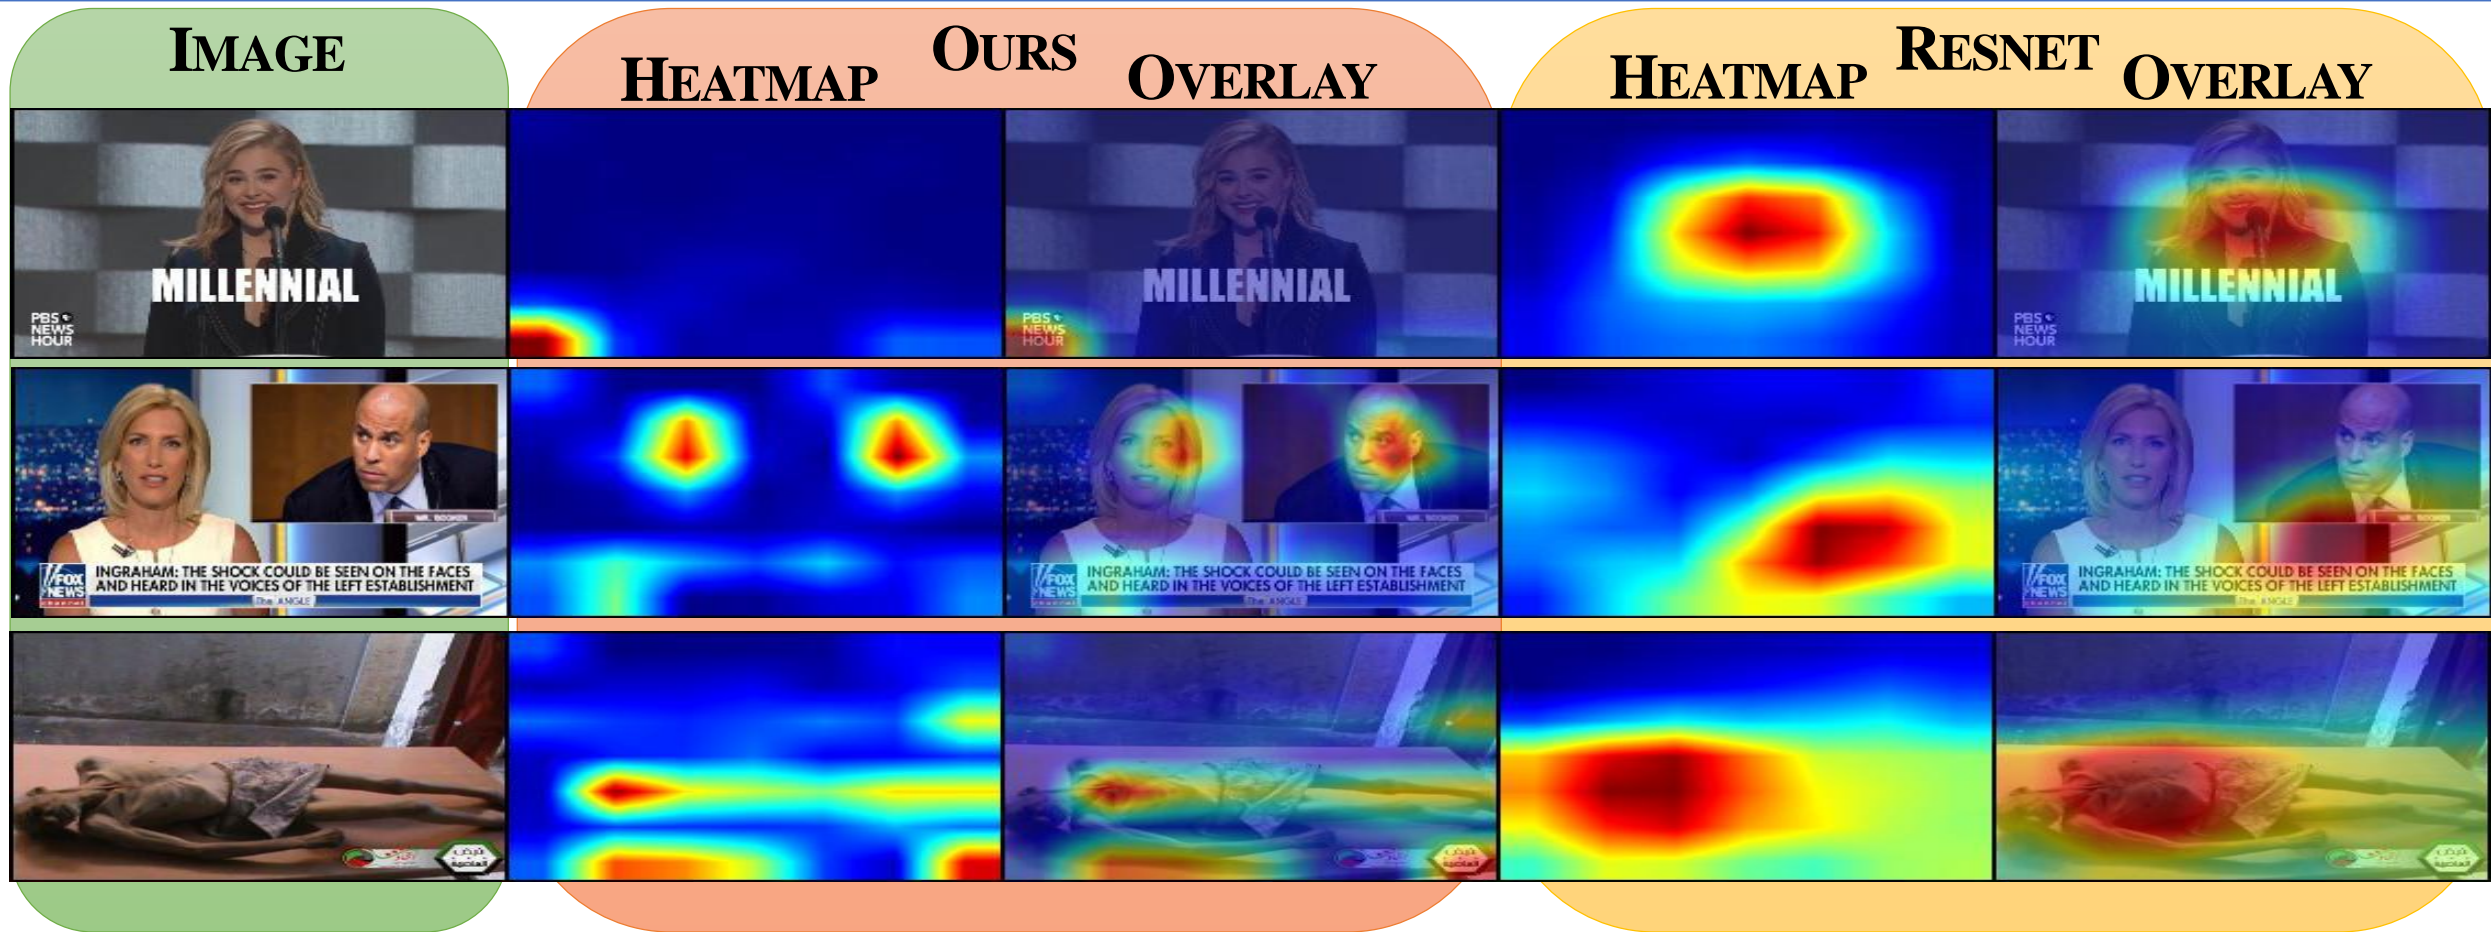

- Our model primarily pays attention to **faces and logos**. The model ignores the face of the person in the first row, but pays attention to the face of the commentator in the second row.
- The model incorrectly predicts the image in the third row; likely because of the logo confuses the model because it likely did not appear in train set and is uncommon



# HUMAN VS. MACHINE ABILITY

HUMAN GUESSED,  
MACHINE FAILED

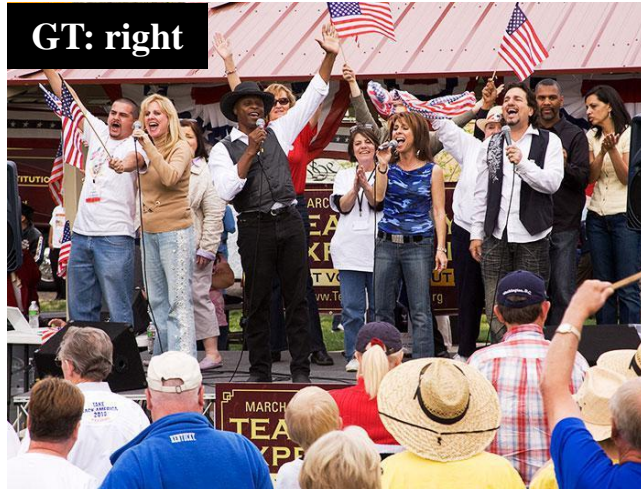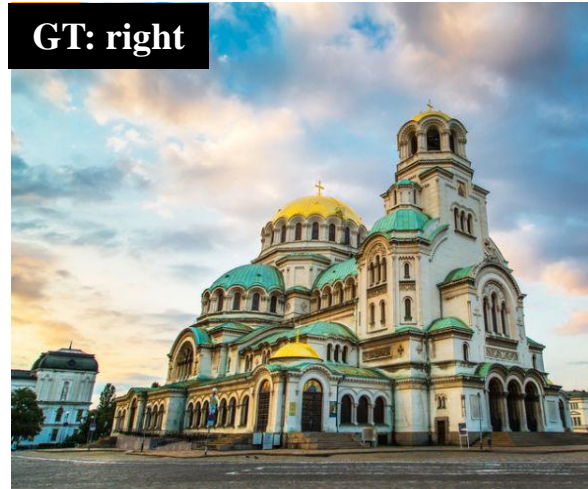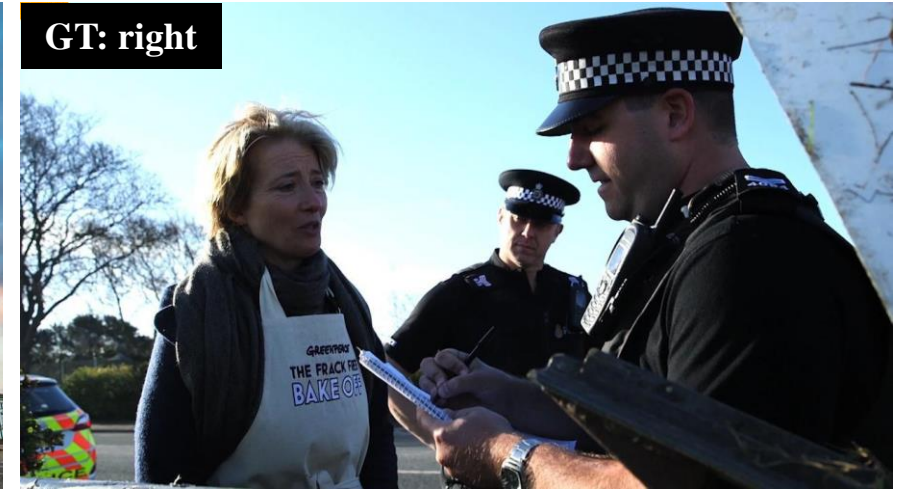

HUMAN FAILED,  
MACHINE GUESSED

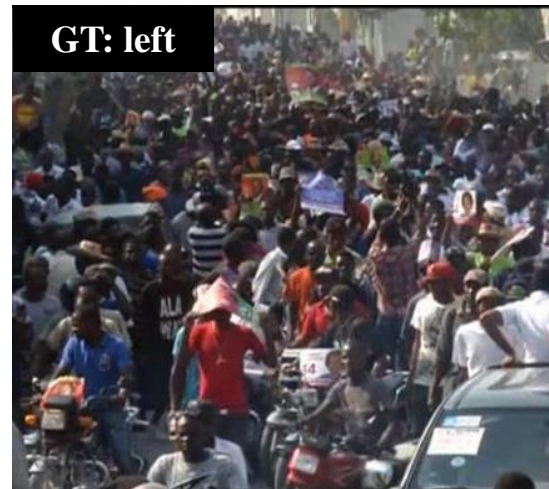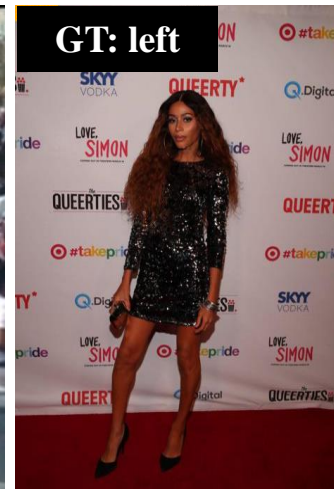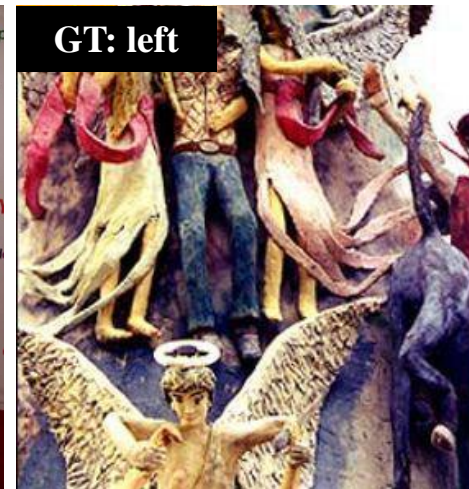

BOTH FAILED

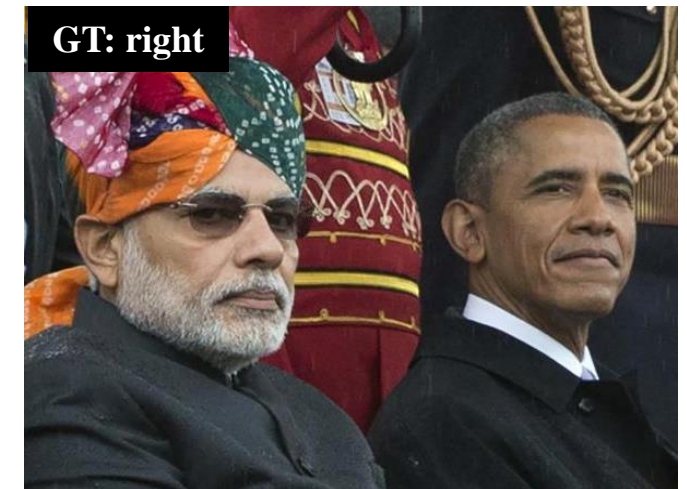

We show images that humans and/or our model were able/unable to classify. We note the top left image has a subtle country vibe, while the other two images require familiarity with a non-Western church and Emma Thompson to understand, which our classifier misses. On the bottom left, we see our classifier predicts protests, celebrities, and art as left-leaning. Finally, we show a challenging image that fooled both humans and machine.



# CONCLUSION

---

- We collected and release a large dataset of biased images and paired article text
- We performed a large-scale human study and collected annotations on our dataset and studied human intuitions surrounding visual political bias
- We presented an approach for predicting the bias of images
  - Uses auxiliary text domain as a source of **privileged information** to guide training
- We showed both quantitative and qualitative experiments demonstrating our method works
- Use cases of our method include automatically inferring bias of media sources or detecting political ads
- Future work may include improved models of image-text alignment, methods for learning joint image-text embeddings under noise, and generating biased images
